1           **Surprising spatiotemporal stability and frequency-independence across**  
2                   **multiple fitness peaks driving adaptive radiation in the wild**

3

4                           Christopher H. Martin<sup>1\*</sup>, Katelyn Gould<sup>2</sup>, Clare Bocklage<sup>2</sup>

5

6           <sup>1</sup>Department of Integrative Biology and Museum of Vertebrate Zoology, University of  
7           California, Berkeley, CA 94720, USA

8

9           <sup>2</sup>Department of Biology, University of North Carolina at Chapel Hill, NC, USA

10

11

12           \*Corresponding Author: [chmartin@berkeley.edu](mailto:chmartin@berkeley.edu)

13

14

15

16

17

18

19

20

21

22

23

24

25

26           Running title: Stability of the adaptive landscape

27           keywords: novelty, key innovation, lepidophagy, adaptive dynamics, negative frequency-

28           dependent disruptive selection, competition

29 **Abstract**

30 The effect of the environment on fitness in natural populations is a fundamental question in  
31 evolutionary biology. However, most empirical field studies of fitness do not experimentally  
32 manipulate phenotypes or environmental conditions and rarely investigate more than a single  
33 species or population. Thus, the relative importance of the competitive environment versus  
34 intrinsic organismal performance in shaping the location, height, and fluidity of fitness peaks on  
35 the adaptive landscape remains largely unknown. We experimentally tested the effect of  
36 competitive environment on a multi-peak fitness landscape driving a microendemic adaptive  
37 radiation of generalist and trophic specialist pupfishes on San Salvador Island, Bahamas. We  
38 manipulated phenotypes, by generating lab-reared hybrid crosses, and competitive environment,  
39 by altering the frequency of rare phenotypes within field enclosures in their natural hypersaline  
40 lake environments on San Salvador. We tracked the growth and survival of 2,611 F4/F5 hybrids  
41 for 3 to 11 months in high- and low-frequency treatments replicated across two lake populations.  
42 We found strong evidence for frequency-dependent growth rates within and between enclosures,  
43 but no evidence for frequency-dependent survival differences. However, both fitness proxies  
44 supported a complex fitness landscape isolating generalist phenotypes on a local fitness peak  
45 separated by a small fitness valley from a higher fitness peak for molluscivores and a large  
46 fitness valley isolating the scale-eating phenotype in all trait dimensions. The striking  
47 consistency of this multi-peak fitness landscape across competitive environments, multivariate  
48 trait axes, and a previous field experiment provides experimental evidence for stasis, possibly  
49 due to fixed biomechanical constraints on organismal performance. These results challenge  
50 existing theory and highlight the interplay of organism and environment underlying the static and  
51 dynamic features of fitness landscapes.

## 52 **Introduction**

53 The adaptive landscape, the complex mapping of fitness onto phenotype or genotype, is both a  
54 central unifying concept in evolutionary biology and an empirical measurement [1–5] which  
55 links the microevolutionary processes of natural and sexual selection in wild populations with  
56 macroevolutionary patterns of speciation, novelty, and adaptive radiation [6–9].

57         Despite its central importance, it remains unclear what factors shape the fitness landscape  
58 across space and time. In classical views arising from both Wright’s [4] and Simpson’s [10]  
59 original conceptions of genotypic and phenotypic fitness landscapes, respectively, and Fisher’s  
60 geometric model [11], fitness optima are static on a high-dimensional fitness landscape. These  
61 static fitness peaks are due to epistasis within genotypic networks [12] or functional tradeoffs  
62 between different ecological niches or collections of similar niches known as adaptive zones  
63 [13]. However, a more recent paradigm originating from game theory [14–17] proposes that the  
64 fitness landscape is dynamic and resembles a trampoline: as the relative frequency of  
65 phenotypically similar individuals increases, their fitness decreases due to increased competition  
66 for resources, whereas rare phenotypes have a fitness advantage [5]. This is known as negative  
67 frequency-dependent disruptive selection and can lead to ecological speciation in sympatry, even  
68 when adapting to a unimodal resource distribution [18–22]. Laboratory and field studies of  
69 natural populations have provided extensive support for negative frequency-dependent disruptive  
70 selection [1,15,23–34] to the extent that some investigators assert its universality in all natural  
71 populations [35]. Due to its elegance and mathematical tractability, frequency-dependence has  
72 also been widely adopted by theorists as the sole mechanism for disruptive selection in most  
73 speciation models [5,9,36].

74           However, the relative contributions of the competitive environment (i.e. frequency-  
75 dependence) versus static fitness optima (i.e. functional tradeoffs) in shaping the broader  
76 topography of fitness landscapes across multiple species remains unknown. For example,  
77 although negative frequency-dependent disruptive selection may be ubiquitous within  
78 populations, the phenotypic scale of frequency-dependence is rarely measured (i.e. the  
79 competition kernel), particularly across multiple species, and can have major impacts on  
80 speciation [18,37]. Similarly, spatiotemporal shifts in the phenotypic location of a fitness  
81 optimum for a population due to environmental stochasticity is often assumed to follow a  
82 Brownian motion process [38,39] without accounting for hard boundaries imposed by functional  
83 tradeoffs or biophysical constraints (but see: [40,41]). Conversely, at broader macroevolutionary  
84 timescales the role of stable fitness optima in shaping trait diversification across a radiation is  
85 frequently tested and supported by fitting Ornstein-Uhlenbeck models of trait diversification  
86 using phylogenetic comparative methods [42–46] while ignoring the ecological effects of  
87 competition and environmental stochasticity (but see [47,48]).

88           To our knowledge, all previous field experimental tests of frequency-dependent selection  
89 involved only a single species or pair of ecomorphs [15,24–26,29,31,34,49,50] and there are still  
90 few studies spanning multiple habitats, traits, time periods, or species. In the few examples of  
91 studies at this larger scale, rare transgressive hybrid phenotypes appear to suffer a fitness cost,  
92 not an advantage [51,52]. For example, in a hybrid mesocosm experiment investigating male-  
93 male competition in stickleback, the rarest transgressive phenotypes experienced the lowest  
94 reproductive success [52], in contrast to predictions of sexual selection as a diversifying force  
95 ([53]; but see [54,55]). We also previously estimated multiple fitness peaks driving adaptive  
96 radiation in a clade of trophic specialist pupfish species endemic to San Salvador Island,

97 Bahamas by measuring the growth and survival of laboratory-reared F2 intercross and backcross  
98 hybrids placed in field enclosures [56]. Hybrid phenotypes resembling the widespread generalist  
99 species were isolated by a local fitness peak, separated by a fitness valley from a higher fitness  
100 peak corresponding to hybrid phenotypes resembling the molluscivore specialist, whereas hybrid  
101 phenotypes resembling the scale-eating specialist suffered the lowest growth and survival.  
102 Interestingly, rare phenotypes in this experiment did not experience a survival advantage and the  
103 scale of frequency-dependent survival appeared to operate only within the range of phenotypic  
104 diversity observed in the generalist population, not all three species [51]. These few experimental  
105 studies of multiple species suggest that frequency-dependent selection may have a limited  
106 phenotypic scale; however, experimental tests manipulating the frequency of rare hybrid  
107 phenotypes are needed.

108 Here we bridged these micro- and macroevolutionary scales by experimentally  
109 manipulating the frequency of rare hybrid phenotypes to test for an effect on the stability of  
110 multiple fitness optima in a tractable system for empirical measurements of the fitness landscape  
111 during nascent adaptive radiation. We created intermediate and transgressive hybrid phenotypes  
112 by multiple rounds of backcrossing and intercrossing between a generalist and two trophic  
113 specialist *Cyprinodon* pupfish species, manipulated the frequency of rare hybrid phenotypes  
114 between treatments in two independent lake populations on San Salvador Island, Bahamas, and  
115 then tracked individual hybrid survival and growth rates. We found negligible effects of  
116 competitor frequency on the survival of hybrids, but strong effects on growth. However, both  
117 fitness proxies supported a large and stable fitness valley isolating the novel scale-eating  
118 specialist across spatial and temporal environments. Our results lend strong empirical field  
119 support for stasis across multiple fitness peaks and valleys driving recent adaptive radiation.

120

## 121 **Results**

### 122 **Field and laboratory survival of transgressive hybrid populations**

123 We individually tagged and photographed 2,611 F4-F5 outbred juvenile hybrids resulting from  
124 crosses of all three species, generalist (*C. variegatus*), molluscivore (*C. brontotheroides*), and  
125 scale-eater (*C. desquamator*), from two different isolated lake populations on San Salvador  
126 Island, Bahamas before release into a high- and low-frequency field enclosure in each lake (Fig.  
127 1; Table S1). The frequency-manipulation increased the frequency of transgressive hybrid  
128 phenotypes in the high-frequency treatment and generalist-type hybrids in the low-frequency  
129 treatment, resulting in a significant reduction in phenotypic variance on discriminant axis 2  
130 (predominantly nasal protrusion) in lake 1 (Levene's test,  $P < 0.0001$ ) and discriminant axis 1  
131 (predominantly oral jaw size) in lake 2 (Levene's test,  $P < 0.0001$ ) within the bivariate  
132 discriminant morphospace separating all three parental species (Fig. S1). The total density of  
133 hybrids was held approximately constant between high and low-frequency treatments (lake 1:  
134 high/low: 923/823 individuals; lake 2: high/low: 842/819 individuals; Table S1).

135 To sample from a broader range of environmental variability, we measured hybrid  
136 survival after 3 months in lake 1 (high-frequency: 77.1% survival; low-frequency: 75% survival)  
137 and after 11 months in lake 2 (high-frequency: 1.4% survival; low-frequency: 1.2% survival;  
138 Table S1), in the latter case spanning half the pupfish reproductive lifespan (approximately 2  
139 years) but avoiding mortality due to senescence. There were no differences in survival  
140 probability between treatments in each lake (two-way logistic regression, treatment effect:  $P =$   
141 0.237). For a control comparison, additional hybrids from each lake population ( $N = 199$  total

142 individuals) were simultaneously tagged, raised in laboratory aquaria, and their deaths and  
143 growth rates were tracked over one year.

144

#### 145 **Hybrid phenotypic diversity**

146 Phenotypic similarity of each hybrid to the three parental species in each lake ( $n = 236$ ) was  
147 calculated from 30 linear traits and angles measured from three pre-release photographs of each  
148 fish (Fig. S3). These traits were used to estimate two linear discriminant (LD) axes with major  
149 loadings (Table S2) of oral jaw size (LD axis 1) and nasal protrusion (LD axis 2), diagnostic  
150 traits of each specialist species and major axes of rapid trait diversification within this radiation  
151 [57,58]. Indeed, after correcting for standard length, residual jaw length variation within our  
152 hybrid populations exceeded the range of variation observed across allopatric *Cyprinodon*  
153 species and outgroup Cyprinodontidae species spanning over 20 million years since their most  
154 recent common ancestor (data from [57]; Fig. 2).

155

#### 156 **Strong directional and nonlinear selection for generalist and molluscivore phenotypes**

157 We fit thin-plate splines using generalized cross-validation or restricted maximum likelihood to  
158 survival and growth rate data to visualize fitness landscapes across the discriminant morphospace  
159 [59]. We found evidence for directional selection on the survival of hybrid phenotypes most  
160 similar to generalist and molluscivore phenotypes in lake 1 (Fig. 3). We also found evidence of  
161 stabilizing selection on the growth rates of generalist and molluscivore phenotypes in this lake  
162 (Fig. S4). Despite low survival rates after 11 months in lake 2, we found strong evidence of  
163 nonlinear selection for hybrid phenotypes resembling the molluscivore. These landscapes were  
164 estimated from very few survivors ( $n = 22$ ); however, the density of non-survivors in the

165 surrounding regions of morphospace and similar patterns in both field enclosures provides robust  
166 support for nonlinear divergent selection for the molluscivore phenotype in this lake. Patterns of  
167 survival in the wild were contrasted by strong directional selection for hybrids resembling the  
168 scale-eater in laboratory control populations from both lakes (Fig. 3).

169 We also used generalized projection pursuit regression to estimate the two multivariate  
170 linear phenotypic axes most strongly associated with survival across the 30-trait morphospace  
171 (Tables S3-S4) without making unfounded parametric assumptions about quadratic curvature as  
172 in canonical rotation analyses [60–62]. Visualization of survival fitness landscapes on the two  
173 major axes of selection indicated that the most transgressive hybrid phenotypes (i.e. least similar  
174 to parental phenotypes) suffered the lowest survival probability across treatments in both lakes  
175 (Fig. 4). In contrast, survival in laboratory control populations was shifted or opposite to the  
176 direction of selection in field enclosures along these two dominant axes of selection (Fig. 4).

177 We estimated the strength of multivariate selection gradients along these two major axes  
178 of selection and found significant evidence of directional selection ( $P < 0.00001$ ) on ridge axis 1  
179 in both lakes and marginal evidence of directional selection on ridge axis 2 in lake 2 (Table 1).  
180 The traits with the highest loadings on ridge axis 1 were a) lower jaw length and b) distance from  
181 the jaw joint to the orbit and on ridge axis 2 were a) angle between the premaxilla and orbit and  
182 b) distance from the premaxilla to the pectoral girdle (Tables S2-S3), further supporting strong  
183 selection on craniofacial trait diversification within this radiation [58].

184

### 185 **No evidence of frequency-dependent survival differences between treatments**

186 We found no evidence of significant treatment effects on either survival probability or the overall  
187 topography of the survival fitness landscape within the discriminant morphospace (Table 2). The



188 fixed effect of treatment did not improve the fit to the survival data in any of the generalized  
189 additive models examined. Instead, models without the effect of frequency treatment were  
190 strongly favored (Table 2;  $\Delta\text{AIC} = 11$ ). Similarly, we found no evidence for frequency-  
191 dependent effects on survival between treatments on the two major axes of selection in either  
192 lake estimated from generalized projection pursuit regression (Table 3). Models without the  
193 effect of treatment provided a marginally better fit to the survival data on the two major axes of  
194 selection in lake 1 ( $\Delta\text{AIC} = 1$ ) and were supported in lake 2 (Table 3;  $\Delta\text{AIC} = 1.8$ ).

195

### 196 **Strong evidence of frequency-dependent growth rates between treatments**

197 In contrast to survival, we found strong support for treatment effects on fitness landscapes  
198 estimated from the independent fitness proxy of growth rate in lake 1 (Table 2; lake 2 was  
199 excluded from all growth rate analyses due to the low number of survivors). Models including  
200 the effect of frequency treatment on log-transformed growth rates in lake 1 were strongly favored  
201 ( $\Delta\text{AIC} = 68.6$ ). This effect was robust to models including univariate splines and thin-plate  
202 splines within the discriminant morphospace (Table 2).

203 Similarly, we found strong support for models including the effect of treatment for the  
204 two major axes of selection across the entire morphospace in each lake estimated from  
205 generalized projection pursuit regression (Table 3). The best supported model included the  
206 effects of frequency treatment and univariate splines on the two major ridge axes of selection and  
207 was strongly favored over a model without the effect of treatment (Table 3;  $\Delta\text{AIC} = 46$ ).

208

### 209 **Phenotypic scale of frequency-dependence for growth rate but not survival**

210 Within each enclosure we estimated the Mahalanobis distance for each hybrid individual, the  
211 distance to the mean hybrid phenotype in the 30-dimensional morphospace correcting for trait  
212 covariances, as an estimate of the rarity of each individual phenotype. We also calculated the  
213 Euclidean nearest neighbor distance to the ten most similar hybrid phenotypes in 30-dimensional  
214 morphospace for each hybrid as an estimate of the local frequency of competing phenotypes.  
215 Overall, these measures estimate the frequency of similar hybrid phenotypes relative to each  
216 hybrid to examine the phenotypic scale of frequency-dependence within each enclosure [51].  
217 The frequency of similar phenotypes was not significantly associated with residual variation in  
218 survival not explained by hybrid phenotype along the two discriminant axes (Fig. 5; Table 2).  
219 Generalized additive models including the fixed effect of competitor frequency (distance to mean  
220 phenotype) only marginally improved the fit to the survival data (Table 2;  $\Delta\text{AIC} = 1$ ; similar  
221 results were found when substituting nearest neighbor Euclidean distance for Mahalanobis  
222 distance: Fig. S1).

223 In contrast, generalized additive models including the fixed effect of competitor  
224 frequency (both Mahalanobis and nearest neighbor distance) strongly improved the fit to the  
225 growth data in lake 1 within the discriminant morphospace, even after accounting for the  
226 treatment effect (Table 2;  $\Delta\text{AIC} = 12$ ). Similarly, for the two major axes of selection estimated  
227 from generalized projection pursuit progression, models including the fixed effect of competitor  
228 frequency substantially improved the fit to the growth data, even after accounting for the  
229 treatment effect (Table 3;  $\Delta\text{AIC} = 3.85$ ).

230

231 **Both fitness proxies support multiple fitness peaks on the adaptive landscape**

232 Generalized additive modeling enables estimation and visualization of a joint fitness landscape  
233 after controlling for the effects of lake and treatment. The best supported models for survival  
234 included a fixed effect of lake and no effect of treatment, with either two univariate smoothing  
235 splines or a thin-plate plate and two smoothing splines modeling selection within the  
236 discriminant morphospace (Table 2). Models including spline terms were strongly supported  
237 over models including fixed linear effects of the discriminant axes (Table 2;  $\Delta\text{AIC} = 18.7$ ). The  
238 best supported models for growth rate in lake 1 included a fixed effect of treatment (lake 2 was  
239 omitted from these analyses due to the low number of survivors available for growth rate  
240 estimates) and two univariate smoothing splines within the discriminant morphospace (Table 2).

241 Strikingly, the best combined models for survival (across both treatments in both lakes)  
242 and growth rate (both lake 1 treatments) each independently supported an isolated fitness peak  
243 for hybrids resembling the generalist separated by a fitness valley from a region of higher fitness  
244 corresponding to the molluscivore phenotype (Fig. 6). This multi-peak landscape, consistent  
245 across both survival and growth rate fitness proxies and different exposure periods in each lake,  
246 was also striking similar to a previous independent field experiment using F2 hybrids in these  
247 same lakes [56]. This supports the surprising spatiotemporal stability of a complex fitness  
248 landscape topography spanning a recent adaptive radiation of trophic specialists across years,  
249 seasons, divergent lake environments, and manipulated frequencies of hybrid transgressive  
250 phenotypes.

251

### 252 **Scale-eating trophic specialists are isolated by a highly stable fitness minimum**

253 Across both treatments and lakes, hybrids resembling the scale-eater phenotype suffered the  
254 lowest survival and growth rates, except in laboratory control populations (Figs. 3-4, 6). This

255 pattern is consistent with previous observations of consistent low survival and growth rates  
256 across density treatments and lakes in scale-eater F2 hybrids; however, in the previous  
257 experiment few of the F2 hybrids fell within the phenotypic range of lab-reared scale-eaters [56].  
258 In our current experiment, over 70 hybrids occurred within the 95% confidence ellipse of lab-  
259 reared F1 scale-eater phenotypes within the discriminant morphospace.

260         However, it is possible that some regions of the high-dimensional trait space may still  
261 connect scale-eater phenotypes to other regions of the morphospace through a fitness ridge  
262 [63,64]. To further explore the relative fitness of scale-eater hybrids, we visualized selection  
263 across all directions in the 30-trait morphospace by repeatedly sampling a random subset of 15  
264 traits, calculating a discriminant axis for scale-eaters relative to generalists within this subspace,  
265 and estimating a survival spline for hybrid phenotypes on each arbitrary multivariate axis (Fig.  
266 7). This results in a visualization of all possible fitness paths between generalist and scale-eater  
267 hybrid phenotypes for all subspaces within the 30-trait morphospace and, importantly, aligns  
268 these multivariate linear axes in the same direction from generalist to scale-eater phenotype for  
269 comparison of fitness curves across random subsets of the trait data. In three out of four field  
270 enclosures (with no relationship in the fourth), hybrids resembling scale-eaters suffered the  
271 lowest survival across nearly all visualized fitness paths, supporting their position in a high-  
272 dimensional fitness valley (Fig. 7). These analyses support a robust fitness minimum or ‘hole’  
273 within the adaptive landscape isolating the scale-eater phenotype from other species which is  
274 consistent across different subsets of traits measured, lake environment, field exposure time, and  
275 frequency of competitors.

276

277 **Discussion**

## 278 **No evidence of frequency-dependent survival in a multi-peak fitness landscape**

279 We conducted an experimental field test of frequency-dependent selection in a nascent adaptive  
280 radiation of trophic specialist pupfishes. We found negligible evidence of frequency-dependent  
281 survival between treatments manipulating the frequency of rare hybrid phenotypes in two  
282 different lake environments nor any relationship between survival and the frequency of  
283 competitors (Figs. 3-5; Tables 2-3). In contrast, growth rate of survivors in each lake showed  
284 strong evidence of frequency-dependence between treatments and increased as the frequency of  
285 hybrids with similar phenotypes decreased in high-frequency enclosures (Tables 2-3, Fig. S6).  
286 These patterns were consistent across two important cross-sections of the 30-trait morphospace:  
287 the two discriminant axes separating the three parental species (Fig. 3) and the two strongest axes  
288 of nonlinear selection estimated from generalized projection pursuit regression (Fig. 4). The lack  
289 of any signal of frequency-dependent survival suggests that differences in survival among hybrid  
290 phenotypes are robust to competitive conditions and reflect intrinsic viability and performance  
291 constraints. These results complement most previous experimental studies of frequency-  
292 dependence which measured only growth rates [15,28,31].

293 Combined estimates of the fitness landscape for both survival and growth rate indicated a  
294 surprisingly consistent topography across space and time comprised of an isolated fitness peak  
295 corresponding to the generalist phenotype separated by a small fitness valley from a higher  
296 fitness peak corresponding to the molluscivore phenotype (Fig. 6). For survival, multiple peaks  
297 emerged from evidence of higher survival of generalist and molluscivore phenotypes after three  
298 months in lake 1 combined with evidence of much higher survival of the molluscivore phenotype  
299 after 11 months in lake 2 (Fig. 3). For growth rate in lake 1, multiple peaks emerged from higher  
300 growth rates of generalist phenotypes in both enclosures combined with moderate molluscivore

301 growth rates and very low scale-eater growth rates in the low-frequency enclosure (Fig. S4).  
302 These joint landscapes are admittedly reflective of combining different frequency treatments,  
303 exposure periods, lake environments, and potentially different selective regimes; however,  
304 comparison of general additive models provided no evidence of different selective regimes  
305 between treatments and only a fixed effect of lake environment, rather than a change in fitness  
306 landscape topography between lake environments (e.g. Table 2: very low support for models  
307 including a ‘by lake’ effect), thus supporting our inference of a single combined selective  
308 environment.

309         Across all four field enclosures and both fitness proxies the most prominent and  
310 consistent feature of fitness landscape topography was a large fitness valley isolating hybrids  
311 resembling the scale-eater, the most morphologically, ecologically, and genetically divergent  
312 specialist in the radiation [65–67], from all other hybrids across treatments, lake environments,  
313 field exposure periods, and across nearly all dimensions of the 30-trait hybrid morphospace  
314 (Figs. 3-4, 6-7). These empirical fitness landscape measurements were also consistent with  
315 observations of low fitness in hybrids partially resembling the scale-eater in a previous  
316 experiment [56].

317

### 318 **Static features of a complex fitness landscape underlie the rare origins of trophic novelty**

319 Overall, while there was strong selection against hybrid phenotypes driving species divergence  
320 in this radiation, hybrid survival showed minimal sensitivity to the frequency of competitors,  
321 supporting the classic view of static fitness peaks and valleys on the adaptive landscape. Indeed,  
322 the combined estimate of the fitness landscape across all four field enclosures in this study was  
323 strikingly similar to the original fitness landscape estimated for the high-density field enclosure

324 in lake 1 in our preview work [56]. This provides robust support for the spatiotemporal stability  
325 of an isolated generalist fitness peak separated by a large fitness valley from scale-eating and a  
326 smaller fitness valley and higher fitness peak for snail-eating. Our study also provides empirical  
327 field experimental data supporting a role for the stable fitness optima and minima frequently  
328 inferred from phylogenetic comparative studies [45,68] and observed in the fossil record [69,70].

329 This strikingly complex, frequency-independent, and persistent multi-peak fitness  
330 landscape within San Salvador Island's hypersaline lakes provides an explanation for the rarity  
331 of trophic specialization across the Caribbean if outgroup generalist populations are under  
332 widespread stabilizing selection opposing trait diversification [56]. Indeed, Caribbean generalist  
333 populations show very little diversity in their trophic skeletal morphology or dietary diversity  
334 relative to San Salvador populations [58]. Scale-eating populations on San Salvador Island also  
335 show strong phylogenetic comparative evidence of adaptation to a new adaptive zone relative to  
336 generalist populations on San Salvador and neighboring islands [58] and stronger pre-mating  
337 isolation and genetic divergence from other species [71–73], consistent with faster rates of trait  
338 divergence and speciation driven by adaptation to this highly novel trophic niche.

339

#### 340 **What factors underlie spatiotemporally consistent fitness landscapes?**

341 The frequency of similar hybrid phenotypes strongly affected growth rates both between and  
342 within enclosures; however, the ultimate survival of hybrids over both 3- and 11-month exposure  
343 periods was unrelated to their relative frequency within enclosures. In contrast to predictions of  
344 the theory of negative frequency-dependent disruptive selection [15,35,74], rare and  
345 transgressive hybrid phenotypes outside parental ranges exhibited the lowest survival rates  
346 within field enclosures. One possible explanation is that the intrinsic viability and basic

347 performance of survival tasks by these hybrids was impaired due to their mosaic hybrid genetic  
348 backgrounds. This may result in mismatched craniofacial traits leading to poor foraging  
349 performance or impaired suction-feeding or scale-biting performance necessary for successful  
350 foraging strikes. For example, the large oral jaws of scale-eaters appear to result from at least  
351 four moderate effect quantitative trait loci on different linkage groups that each increase jaw size  
352 [75], suggesting that the genetic basis of even this single trophic trait is moderately polygenic  
353 and may not be fully recovered within F4/F5 hybrids. Furthermore, F1 hybrid scale-eaters  
354 exhibit foraging kinematics during scale-biting strikes more similar to generalists which violates  
355 expectations of additivity, suggesting that kinematic behaviors may be non-additive and severely  
356 mismatched in more advanced hybrids [76]. Impaired foraging performance of hybrids similar to  
357 scale-eaters in field enclosures is also supported by the observation that hybrids with scale-eater  
358 morphologies in laboratory control aquaria showed the highest survival rates when fed only  
359 pellet foods (Figs. 3-4). This indicates that the field environment is contributing to the low  
360 survival of scale-eater hybrids.

361 An alternative non-mutually exclusive possibility is that intrinsic genetic  
362 incompatibilities within hybrids are contributing to their low survival rates, particularly if more  
363 transgressive hybrid phenotypes are associated with a greater number or more severe genetic  
364 incompatibilities. Although the San Salvador radiation only diverged approximately 10,000 years  
365 old, trophic specialists within the radiation contain ancient adaptive variants also found in  
366 outgroups that diverged over 5 million years ago (Richards et al. in prep.). Genetic  
367 incompatibility loci are known to segregate in wild populations ([77]; reviewed in [78]) and  
368 hundreds of genetic incompatibility loci have also been found between swordtail fish species of  
369 similar ages [79,80]. In support of this hypothesis, F1 hybrids of specialist species within the



370 San Salvador radiation show evidence of hybrid gene misregulation in approximately 10% of  
371 their differentially expressed genes, i.e. gene expression levels significantly different from  
372 parental expression levels, in whole larvae at 8 days post fertilization (dpf) and within  
373 craniofacial tissues at 17-20 dpf, respectively [81,82]. Although the fitness effects on hybrids are  
374 unknown, hybrid gene misregulation has been shown to affect hybrid viability and sterility in  
375 other systems [83–87] and misregulated genes in San Salvador Island pupfish species are  
376 enriched for developmental processes affecting ecological traits relevant to trophic  
377 specialization, including craniofacial morphology, muscle mass, and nitrogen metabolism [82].  
378 However, the link between transgressive hybrid phenotypes and the extent of hybrid  
379 misexpression or genetic incompatibilities is still unknown.

380

### 381 **Does a large and stable fitness valley isolate scale-eating trophic specialization?**

382 Scale-eating (lepidophagy) is a particularly rare trophic niche among fishes and has evolved  
383 independently only 19 times across diverse marine, coastal, riverine, and lacustrine environments  
384 [65,88–90] and across ontogenetic stages from juveniles only to obligate scale-eating adults [91–  
385 94]. In particular, it is unusually rare among cyprinodontiform fishes: lepidophagy is only known  
386 to have evolved once within the San Salvador Island radiation and is thus separated by 168  
387 million years of evolutionary time from the most closely related scale-eating specialists (within  
388 all three radiations of East African haplochromine cichlids [65]).

389         There are multiple scale-eating strategies and multiple hypotheses for the origins of scale-  
390 eating [88,90], supporting the observation that different fish lineages have different evolutionary  
391 potential to evolve scale-eating (e.g. relatively common in East African haplochromine cichlids,  
392 rare in cyprinodontiforms). For example, scale-biting pursuit predators, including the scale-

393 eating pupfish, wimple piranha (*Cataprin mento*), and cookie-cutter shark (*Isistius brasiliensis*),  
394 tear off scales and mucus from the side of their prey with perpendicular strikes using their entire  
395 oral jaws, whereas scale-rasping specialists, such as *Roeboides* tetras and khavalchor catfish  
396 (*Pachypterus khavalchor*), employ specialized externally protruding premaxillary teeth to  
397 dislodge scales from the sides of their prey [92,95,96]. However, in nearly all cases, scale-eaters  
398 are size-limited relative to their prey, unlike piscivorous fishes which generally grow much  
399 larger [97]. This difference suggests that the energetic payoff from scales is low relative the  
400 energetic demands of high-speed scale-eating or scale-rasping strikes. Scale-eating pupfish strike  
401 approximately once per minute in the wild, resulting in only a few scales and a mouthful of  
402 mucus per high-speed strike completed within 10 - 15 ms [98]. Overall, the rarity, high  
403 performance demands, and low caloric payoffs of scale-eating suggest that a wide and deep  
404 fitness valley isolates this niche and the necessary adaptive traits from all other ecological  
405 niches.

406 Consistent with this biomechanical prediction, our fitness data suggest that hybrids  
407 resembling scale-eaters suffered the highest fitness costs in growth and survival across all  
408 treatments, lakes, trait subsets, and time periods, but not in laboratory control aquaria fed only  
409 pellet foods. This provides an unexpected explanation for the rarity of scale-eating across  
410 cyprinodontiforms fishes if adapting to this specialized trophic niches requires multiple  
411 phenotypic traits that only provide fitness benefits in combination (i.e. fitness epistasis [12]).  
412 This is supported by existing population genomic and quantitative genetic evidence which  
413 suggests that adaptation to scale-eating is multifactorial and that multiple sources of adaptive  
414 variation from across the Caribbean contributed to trait diversification in this radiation  
415 [67,75,99]. The relevant adaptive alleles for scale-eating may be mismatched within hybrids,

416 such that all necessary morphological and behavioral traits never occurred within a single  
417 individual in our experimental hybrid populations. For example, aggressive and energetically  
418 demanding scale-eating behaviors may be highly deleterious in individuals with small oral jaws  
419 [76]. Although we included outbred backcrosses to scale-eaters in our hybrid populations, some  
420 generalist and molluscivore hybrid ancestry in these individuals may have impaired their scale-  
421 eating performance and behaviors so that scale-eating strikes were no longer energetically  
422 efficient. Conversely, algae-scraping with enlarged oral jaws or highly energetic strikes by  
423 hybrids resembling the generalist may also not provide a sufficient energy surplus for survival  
424 under field conditions.

425

#### 426 **Evidence for a holey adaptive landscape**

427 One alternative metaphor to the fitness landscape is that the relationship between high-  
428 dimensional genotype or phenotype space and fitness more closely resembles a series of fitness  
429 ridges bypassing large regions of low fitness, or ‘holes’ [63,100]. The concept of holey adaptive  
430 landscapes emphasizes the possibility that two apparent fitness peaks in some low-dimensional  
431 phenotype or genotype space may be connected by a fitness ridge in higher-dimensional spaces.  
432 We tested this prediction by looking for fitness ridges connecting scale-eater phenotypes to  
433 generalist and molluscivore phenotypes across 500 random cross-sections in the 30-trait  
434 morphospace, rather than examining only a single two-dimensional cross-section. We found no  
435 evidence of a fitness ridge in any linear combination of these 30 traits connecting scale-eaters to  
436 other species in the radiation, instead nearly all survival curves appeared to decline in the region  
437 of the morphospace containing scale-eaters (Fig. 7). In one of the low-frequency treatments,  
438 survival curves showed no decline, but this treatment also included few hybrids closely

439 resembling the scale-eater phenotype and showed high survival overall (Fig. 7b). Thus, the entire  
440 volume of high-dimensional morphospace within our trait dataset containing the scale-eater  
441 phenotype appears to lead to a fitness minimum, or ‘hole’, isolating scale-eating phenotypes  
442 from the rest of the radiation. However, we failed to find evidence of any fitness ridges  
443 connecting these phenotypes to other species, one of the major predictions of the holey adaptive  
444 landscape hypothesis. Nonetheless, fitness ridges may still exist in genotype space or across  
445 unmeasured trait dimensions.

446

#### 447 **Conclusion: on the origins of novelty during adaptive radiation on multiple fitness peaks**

448 The sensitivity of fitness landscape topography to the environment is rarely measured beyond a  
449 single population or fitness peak. Here we experimentally tested the effect of competitor  
450 frequency on a fitness surface spanning diverse hybrid phenotypes within a nascent adaptive  
451 radiation, comparable to phenotypic divergence spanning over 20 million years of  
452 Cyprinodontiform evolution (Fig. 1). Growth rate exhibited strong dependence on the frequency  
453 of similar phenotypes within and among field enclosures as predicted. However, hybrid survival  
454 showed no signal of frequency-dependence, challenging existing theory and previous  
455 experiments on a single population or species pair. Furthermore, major features of the fitness  
456 landscape, including generalist and molluscivore fitness peaks and a large fitness valley isolating  
457 scale-eaters, were strikingly consistent across lake environments, competitor frequency, and field  
458 exposure period. This challenges our existing view of empirical fitness surfaces as highly  
459 sensitive to environmental perturbation. Instead, multi-peak fitness landscapes spanning  
460 macroevolutionary levels of phenotypic disparity display both static and dynamic features across

461 space, time, and fitness proxy. These empirical results strengthen the connection between  
462 microevolutionary dynamics and static features of macroevolutionary fitness landscapes.

463

## 464 **Materials and methods**

### 465 *Focal lakes*

466 Laboratory breeding colonies of all three species were collected from two different focal lakes  
467 (lake 1: Crescent Pond; lake 2: Little Lake) in 2008, 2013, and 2014 using seine nets and hand  
468 nets while snorkeling. Crescent Pond is a 500 m x 60 m x 2 m deep hypersaline (40 ppt) lake  
469 containing a 0.1 – 0.3 m layer of fine silt on hard carbonate bedrock and is isolated from  
470 surrounding lakes by a small limestone ridge. Generalists and molluscivores are morphologically  
471 more similar in this lake than others due to a shorter nasal protrusion and exhibit a sister  
472 relationship across most of their genome [71,99]. There is only one other fish species in Crescent  
473 Pond, *Gambusia hubbsi*. Little Lake is a 2.3 km x 1 km x 4 m deep hypersaline (40 ppt) lake  
474 with a substrate consisting of *Cerithium* spp. snail shells and other molluscs and is connected to  
475 the larger interior Great Lake system through a sand bar. The lake contains two fish species  
476 *Gambusia hubbsi* and *Atherinomorus stipes* and the amphibious *Kryptolebias marmoratus*.  
477 Aquatic flora in both lakes is dominated by thick mats of three macroalgal species (*Acetabularia*  
478 *crenulata*, *Batophora oerstedii*, and *Cladophora* sp.) and wigeon grass (*Ruppia maritima*); only  
479 Little Lake is surrounded by red mangrove (*Rhizophora mangle*) forests [58].

480

### 481 *Experimental hybrid populations*

482 Independently for each focal lake, laboratory colonies of all three species were crossed in all  
483 directions resulting in both outbred F2 intercrosses and backcrosses (as originally described in

484 [56]). Hybrid populations from each lake were raised for an additional one to two generations in  
485 a common laboratory environment before backcrossing to independently sampled colonies of  
486 each parental species from each lake (collected in 2013 and 2014), resulting in an outbred  
487 population of F4 and F5 intercross and backcross hybrids for each lake, each originating from  
488 colonies of 10 – 20 wild-caught individuals from all three species.

489 Over six weeks, approximately 6,000 F4 and F5 hybrids were bred and raised in  
490 recirculating 151-liter aquaria at 5-10 ppt salinity, 25 – 29° C, on a diet of newly hatched brine  
491 shrimp, commercial pellet foods, frozen seafood, and dried seaweed. 95% water changes were  
492 performed every other day. Juvenile hybrids were size-sorted using 1/8” mesh bags identical to  
493 the field enclosure material resulting in a range of SL from 11.2 – 22.0 mm. Hybrids were  
494 packed in oxygen-permeable shipping bags (Kordon, Inc.) and shipped to San Salvador Island,  
495 Bahamas in packing crates (Rubbermaid ActionPacker Storage Box) as checked airline baggage.

496

#### 497 *Field enclosure experiments*

498 Hybrids were temporarily held in concrete holding tanks with flow-through seawater at the  
499 Gerace Research Centre after arrival. Each individual was again size-sorted through 1/8” mesh  
500 bags, anesthetized in a solution of buffered MS-222 (Finquel, Inc.), photographed on the left,  
501 right, and dorsal sides using a Canon EOS 60D with an EF-S 60 mm f/2.8 USM macro lens  
502 mounted on a tripod with external flash, and finally injected subcutaneously in the left dorsal  
503 musculature with a 1 mm x 0.1 mm stainless steel sequential coded wire tag using a handheld  
504 multi-shot injector (Northwest Marine Technologies, Inc.). A fin-clip from the caudal fin of each  
505 fish was removed and stored with the archival tag in 100% ethanol at -20° C. Tagged hybrids  
506 were allowed to recover for at least 4 days in flow-through holding tanks at the Gerace Research

507 Centre to fully regrow their caudal fins while fed on a diet of newly hatched brine shrimp and  
508 commercial pellet foods.

509 Field enclosures were 3.6 m x 4.9 m rectangular fully-enclosed bags with a mesh size of  
510 0.318 cm (Christiansen's Net Company, Inc.) secured to either PVC pipe set in concrete (lake 1)  
511 or iron rebar hammered into the substrate (lake 2; Fig. 1). Two enclosures were deployed in the  
512 littoral zone of each lake after removing any debris, then the bottom mesh wall was weighted  
513 down with rocks and logs covered in macroalgae from the surrounding area and filled with  
514 benthic substrate, macroalgae, and wigeon grass from surrounding areas. Care was taken to avoid  
515 introduction of any adult fishes, but smaller pupfish and mosquitofish could still enter the  
516 enclosure through the mesh.

517 One enclosure in each lake was randomly selected as the high frequency treatment and  
518 the second enclosure was the low frequency treatment. Hybrids were individually selected for  
519 each treatment by eye, selecting more divergent phenotypes for the high-frequency treatments  
520 and selecting the most generalist-like hybrids for the low-frequency treatments. This resulted in  
521 reduced phenotypic variance and morphospace occupation within the low-frequency treatment  
522 within each lake. This also effectively reduced the frequency of scale-eater hybrids falling within  
523 the 95% confidence interval of parental scale-eater phenotypes. Hybrid densities within  
524 enclosures approximated the natural densities of 0.9% and 3% scale-eaters and 6 and 5%  
525 molluscivores in Crescent Pond and Little Lake, respectively [65].

526 In Crescent Pond (lake 1), tagged hybrids were released in large batches into the high-  
527 frequency enclosure on May 15<sup>th</sup>, 19<sup>th</sup>, and 28<sup>th</sup> and low-frequency enclosure on May 21<sup>st</sup>, 26<sup>th</sup>,  
528 and 28<sup>th</sup>, 2014, respectively. In Little Lake (lake 2), all tagged hybrids were released into the  
529 high-frequency enclosure on May 18<sup>th</sup> and into the low-frequency enclosure on May 25<sup>th</sup> and

530 27<sup>th</sup>, 2014. Surviving hybrids were recovered from lake 1 on August 26<sup>th</sup> and 27<sup>th</sup>, 2014 after 3  
531 months by carefully removing the substrate and sequentially lifting the entire mesh bottom, then  
532 photographed laterally and stored in 100% ethanol. To sample from a wider range of seasonal  
533 environments and recover the full time to reproductive maturity, surviving hybrids were  
534 recovered from lake 2 on April 28<sup>th</sup> and 29<sup>th</sup>, 2015 after 11 months in field enclosures. Tags were  
535 dissected from all survivors after preservation, read using a 100x tag-reading scope from  
536 Northwest Marine Technologies, Inc, and matched with archival tags to identify the survival  
537 status (0 or 1) of each tagged hybrid.

538

### 539 ***Laboratory control***

540 Additional hybrids from each population ( $n = 199$ , Table S1) were raised in two 151-liter  
541 laboratory aquaria concurrent with the field experiment for 11 months. Control hybrids were  
542 raised on a diet of only commercial pellet foods to provide a uniform resource offering no  
543 advantages for specialized trophic morphology. Hybrids were fed once daily an amount of food  
544 that could be consumed in five minutes but not *ad libitum* and raised at 26 – 27° C in 5-10 ppt  
545 salinity (Instant Ocean) with weekly 95% water changes. Laboratory hybrids grew faster than  
546 fish placed in field enclosures and high densities within each aquarium population led to intense  
547 competition for food and high mortality rates, whereas survivors collected from field enclosures  
548 never reached maximum adult sizes or approached senescence. The day of each laboratory death  
549 was recorded, followed by removal of the tag to identify the pre-release photograph of that  
550 individual. Laboratory deaths were tracked from July 1<sup>st</sup>, 2014 until May 21<sup>st</sup>, 2015.

551

### 552 ***Morphometrics***



553 Each hybrid used in field experimental ( $n = 2,611$ ) and laboratory control populations ( $n = 199$ )  
554 was measured for 21 landmarks (Fig. S3) on both left and right lateral sides and 10 landmarks on  
555 the dorsal surface of the head plus a 4 mm size-standard grid for calibration of each image using  
556 TpsDig2 [101]. F1 lab-reared individuals of each parental species from each lake ( $n = 236$ ) were  
557 also measured in the same way. 27 linear distances and three angles were calculated from these  
558 landmarks and then averaged for both lateral sides, resulting in 30 trait measurements plus  
559 standard length. Traits were selected to capture phenotypic divergence in craniofacial  
560 morphology and body shape (Fig. S3).

561 Linear trait measurements and angles were then imported into R (R Development Core  
562 Team 2018) and size-corrected by taking the residuals from a standard major axis regression  
563 relative to log-transformed standard length (SL) for each trait in the entire hybrid pool and F1  
564 lab-reared parental individuals from both lakes ( $n = 110$  generalists, 45 molluscivores, 81 scale-  
565 eaters) using the sma function in the smatr package [103] in R. Standard major axis regression is  
566 appropriate when trait measurement error is present on the x-axis and the y-axis and is equivalent  
567 to the first principal component of phenotypic variance between these two axes [103]. Initial  
568 inspection of size-correction plots indicated that ordinary least squares (OLS) regression tended  
569 to overestimate the slope of the regression line, particularly for highly variable traits among  
570 parental and hybrid populations such as oral jaw length. However, our results were robust to  
571 OLS size-correction. No allometric scaling was observed among different species except for  
572 nasal protrusion distance and nasal protrusion angle, which exhibited no association with log-  
573 transformed SL and were not size-corrected. All size-corrected trait residuals and uncorrected  
574 nasal protrusion distance and angle were standardized to a standard deviation of one and mean of  
575 zero for comparisons across traits. There was no effect of standard length at introduction on

576 survival of hybrids (GLM logistic regression with effects of field enclosure and log-transformed  
577 SL:  $P = 0.709$ )

578

### 579 *Visualization of fitness landscapes*

580 Fitness landscapes were visualized in each enclosure by fitting thin-plate splines to the survival  
581 (binomial) or growth rate (normal) data for each hybrid using generalized cross-validation  
582 (GCV), which minimizes residual prediction error of the spline surface. Splines were estimated  
583 using the Fields package [59] in R. When over-fitting was apparent, restricted estimation of  
584 maximum likelihood (REML) was used to estimate the curvature of the spline instead of GCV  
585 (used for both survival landscapes in lake 2; REML estimation of splines was identical to GCV  
586 surfaces in lake 1). Growth rate was only examined in lake 1 due to the low number of survivors  
587 with growth rate data from lake 2 (Table S1).

588 We focused on two different cross-sections of the 30-dimensional hybrid morphospace.  
589 First, we examined selection on the two-dimensional linear discriminant morphospace  
590 maximizing phenotypic separation among the three parental species from both lakes using the  
591 lda function in the MASS package in R [104]. This morphospace provides a simple index of  
592 hybrid similarity to each of the three parental species, comparable to multivariate hybrid indices  
593 from similar studies of hybrid fitness between two species (e.g. [28,105]). Second, we examined  
594 the two major axes of nonlinear selection within the 30-dimensional morphospace using  
595 generalized projection pursuit regression for binomial data using the gppr function in the gsg  
596 package in R [62,106], following the original recommendations of [61]. This approach avoids the  
597 problematic quadratic assumptions of canonical rotation [107,108], particularly for highly  
598 nonlinear data such as ours, and enables visualization of the strongest axes of nonlinear selection

599 within the dataset. We calculated the first two ridge axes using the `gppr` function with a binomial  
600 family of response distributions and then projected hybrid phenotypes onto each ridge axis by  
601 matrix multiplication. We performed generalized projection pursuit regression separately for lake  
602 1 and lake 2 hybrid populations due to the large differences in survival (Table S1).

603

#### 604 *Generalized additive modeling*

605 We formally tested for experimental treatment effects on fitness landscapes using generalized  
606 additive modeling in the `mgcv` package [109] in R. This modeling framework enables  
607 incorporation of spline terms into generalized linear models and comparisons of models  
608 containing spline, fixed, and random effect terms using AIC. For the survival data, we compared  
609 models with the fixed effects of treatment and lake and all combinations of univariate smoothing  
610 splines and thin-plate splines on both discriminant axes (Table 2) or both major ridge axes of  
611 selection estimated from generalized projection pursuit regression (Table 3). We also explored  
612 models allowing the thin-plate spline surface (i.e. the fitness landscape) to vary between lake  
613 environments using the ‘by’ term within the thin-plate function. Finally, we included models  
614 with a covariates including log-transformed standard length and distance measures of competitor  
615 frequency within each enclosure based on either Mahalanobis distance or nearest-neighbor  
616 Euclidean distance (see below). Models were compared using AIC. We examined a similar range  
617 of models for the growth rate data, calculated from the difference in log-transformed SL between  
618 pre-release photographs and surviving fish. However, we excluded lake 2 from all growth rate  
619 analyses due to the low number of survivors in this lake.

620

#### 621 *Analyses of frequency-dependent selection within enclosures*

622 We used two approaches to measure the frequency of competitors within each enclosure. First,  
623 we calculated the Mahalanobis distance from each hybrid phenotype to the mean hybrid  
624 phenotype in the full 30-trait morphospace using the mahalanobis function in R. This distance  
625 estimates the disparity of each hybrid relative to the most abundant hybrid phenotypes while  
626 accounting for trait correlations. We also measured the frequency of competitors in the local  
627 region of morphospace surrounding each hybrid by calculating the sum of the Euclidean distance  
628 to the ten nearest neighbors in the full 30-trait morphospace, following the approach in [51]. We  
629 used the knn.dist function in the FNN package [110] to calculate the matrix of distances  
630 among all hybrid pairs.

631

### 632 *Analyses of a fitness valley for scale-eater phenotypes*

633 To evaluate the stability of a survival fitness valley near scale-eaters across all dimensions in our  
634 30-trait morphospace, we estimated and visualized smoothing splines for survival from random  
635 subsets of the trait dataset. We first estimated a smoothing spline for survival relative to the  
636 discriminant axis (LD1 in Fig. 3) for all 30 traits separating parental scale-eater phenotypes from  
637 generalist phenotypes. We then randomly drew 15 traits from the dataset and recalculated the  
638 generalist-scale-eater discriminant axis and a new survival spline for 500 trait subsets using a  
639 custom script in R. This enabled alignment of each discriminant vector from generalist to scale-  
640 eater regardless of the subset of traits sampled. Each of the 500 discriminant vectors was then  
641 rescaled to the mean parental scale-eater phenotype, so that each hybrid could be scored on the  
642 same scale proportional to their phenotypic similarity to the scale-eater (i.e. 1 = full match).  
643 Survival splines were estimated separately for each field enclosure and plotted on a shared,

644 rescaled generalist-scale-eater discriminant axis to visualize the overall evidence for a fitness  
645 valley in the scale-eater region.

646

## 647 **Acknowledgments**

648 We thank the Miller Institute for Basic Research in Science, the University of North Carolina at  
649 Chapel Hill, NSF CAREER award 1749764, and NIH 5R01DE027052-02 for funding to CHM.  
650 The Bahamas Environmental Science and Technology Commission and the Ministry of  
651 Agriculture kindly provided permission to export, import, and tag fish and conduct this research.  
652 Erica Bree Rosenblum generously provided laboratory animal space at the University of  
653 California, Berkeley. Rochelle Hanna, Velda Knowles, Thomas Rothfus, Markshaun Fields, and  
654 the Gerace Research Centre provided logistical assistance; Alexander Payne, Christina Lim,  
655 Qiongqiong Mei, Ivan Piedad, Sarah Bencuya, Stephanie Jeselson, Courtney Farge, Kristi Dixon,  
656 and David Richard assisted with morphological measurements; and Erica Bree Rosenblum, Craig  
657 Miller, Emilie Richards, Michelle St. John, and Joseph McGirr provided helpful comments on  
658 the research and presentation. All animal care protocols were approved by the University of  
659 California, Berkeley and the University of North Carolina at Chapel Hill Animal Care and Use  
660 Committees.

661

## 662 **References**

- 663 1. Svensson EI, Calsbeek R. The adaptive landscape. Oxford: Oxford University Press;  
664 2012.
- 665 2. Carneiro M, Hartl DL. Adaptive landscapes and protein evolution. Proc Natl Acad Sci.  
666 2010;107: 1747–1751. doi:10.1073/pnas.0906192106

- 667 3. Lande R. Quantitative genetic analysis of multivariate evolution, applied to brain: body  
668 size allometry. *Evolution*. 1979;33: 402–416. Available:  
669 <http://www.jstor.org/stable/10.2307/2407630>
- 670 4. Wright S. The roles of mutation, inbreeding, crossbreeding and selection in evolution.  
671 *Proc Sixth Int Congr Genet*. 1932;1: 356–366. Available:  
672 [http://scholar.google.com/scholar?cluster=10119462848045751904&hl=en&as\\_sdt=0,5#1](http://scholar.google.com/scholar?cluster=10119462848045751904&hl=en&as_sdt=0,5#1)
- 673 5. Gavrilets S. *Fitness landscapes and the origin of species*. Princeton University Press;  
674 2004.
- 675 6. Kingsolver JG, Hoekstra HE, Hoekstra JM, Berrigan D, Vignieri SN, Hill CE, et al. The  
676 strength of phenotypic selection in natural populations. *Am Nat*. 2001;157: 245–61.  
677 doi:10.1086/319193
- 678 7. Arnold SJ, Pfrender ME, Jones AG. The adaptive landscape as a conceptual bridge  
679 between micro- and macroevolution. *Genetica*. 2001;112–113: 9–32. Available:  
680 <http://www.ncbi.nlm.nih.gov/pubmed/11838790>
- 681 8. Lande R, Arnold SJ. The Measurement of Selection on Correlated Characters. *Evolution*  
682 (N Y). 1983;37: 1210. doi:10.2307/2408842
- 683 9. Martin CH, Richards EJ. The paradox behind the pattern of rapid adaptive radiation: how  
684 can the speciation process sustain itself through an early burst? *Annu Rev Ecol Evol Syst*.  
685 2019; In press.
- 686 10. Simpson G. *Tempo and mode in evolution*. 1944.
- 687 11. Fisher R. *Genetical theory of natural selection*. Clarendon Press; 1930.
- 688 12. Whitlock M, Phillips P, Moore F, Tonsor S. Multiple fitness peaks and epistasis. *Annu*  
689 *Rev Ecol Syst*. 1995;26: 601–629. Available:

- 690 <http://www.jstor.org/stable/10.2307/2097221>
- 691 13. Simpson GG. Tempo and Mode in Evolution. 1944; 197–217.
- 692 14. Abrams P, Matsuda H, Harada Y. Evolutionarily unstable fitness maxima and stable  
693 fitness minima of continuous traits. *Evol Ecol*. 1993;
- 694 15. Bolnick DI. Can Intraspecific Competition Drive Disruptive Selection? an Experimental  
695 Test in Natural Populations of Sticklebacks Can Intraspecific Competition Drive  
696 Disruptive Selection? an Experimental Test in Natural Populations of Sticklebacks.  
697 *Evolution (N Y)*. 2004;58: 608–618. doi:10.1554/03-326
- 698 16. Abrams P. Modelling the adaptive dynamics of traits involved in inter- and intarspecific  
699 interactions: An assesment of three methods. *Ecol Lett*. 2001;4: 166–175.  
700 doi:10.1046/j.1461-0248.2001.00199.x
- 701 17. Doebeli M, Dieckmann U. Adaptive dynamics as a mathematical tool for studying the  
702 ecology of speciation processes. *J Evol Biol*. 2005;18: 1194–200. doi:10.1111/j.1420-  
703 9101.2005.00912.x
- 704 18. Dieckmann U, Doebeli M. On the origin of species by sympatric speciation. *Nature*.  
705 1999;400: 354–7. doi:10.1038/22521
- 706 19. Doebeli M, Dieckmann U, Metz JA, Tautz D. What we have also learned: adaptive  
707 speciation is theoretically plausible. *Evolution (N Y)*. 2005;59: 691–699.  
708 doi:10.1111/j.0014-3820.2005.tb01028.x
- 709 20. Otto SP, Servedio MR, Nuismer SL. Frequency-dependent selection and the evolution of  
710 assortative mating. *Genetics*. 2008;179: 2091–112. doi:10.1534/genetics.107.084418
- 711 21. Matessi C, Gimelfarb A, Gavrillets S. Long-term buildup of reproductive isolation  
712 promoted by disruptive selection: how far does it go? *Selection*. 2002;2: 41–64. Available:

- 713 <http://www.akademai.com/index/P265T18035488188.pdf>
- 714 22. Bürger R, Schneider KA. Intraspecific competitive divergence and convergence under  
715 assortative mating. *Am Nat.* 2006;167: 190–205. doi:10.1086/499375
- 716 23. Kassen R, Llewellyn M, Rainey PB. Ecological constraints on diversification in a model  
717 adaptive radiation. *Nature.* 2004;431: 984–988. doi:10.1038/nature02917.1.
- 718 24. Weeks A, Hoffmann A. Frequency-dependent selection maintains clonal diversity in an  
719 asexual organism. *Proc Natl Acad Sci USA.* 2008;105: 17872–17877.
- 720 25. Kusche H, Lee HJ, Meyer A. Mouth asymmetry in the textbook example of scale-eating  
721 cichlid fish is not a discrete dimorphism after all Subject collections Mouth asymmetry in  
722 the textbook example of scale-eating cichlid fish is not a discrete dimorphism after all.  
723 2012; doi:10.1098/rspb.2012.2082
- 724 26. Pfennig D. POLYPHENISM IN SPADEFOOT TOAD TADPOLES AS A LOCALLY  
725 ADJUSTED EVOLUTIONARILY STABLE STRATEGY. *Evolution (N Y).* 1992;46:  
726 1408–1420.
- 727 27. Bolnick DI, Lau OL. Predictable patterns of disruptive selection in stickleback in  
728 postglacial lakes. *Am Nat.* 2008;172: 1–11. doi:10.1086/587805
- 729 28. Schluter D. Frequency dependent natural selection during character displacement in  
730 sticklebacks. *Evolution.* 2003;57: 1142–50. Available:  
731 <http://www.ncbi.nlm.nih.gov/pubmed/12836830>
- 732 29. Olendorf R, Rodd FH, Punzalan D, Houde AE, Hurt C, Reznick DN, et al. Frequency-  
733 dependent survival in natural guppy populations. *Nature.* 2006;441: 633–6.  
734 doi:10.1038/nature04646
- 735 30. Koskella B, Lively CM. Evidence for negative frequency-dependent selection during



- 736 experimental coevolution of a freshwater snail and a sterilizing trematode. *Evolution*.  
737 2009;63: 2213–21. doi:10.1111/j.1558-5646.2009.00711.x
- 738 31. Bolnick DI, Stutz WE. Frequency dependence limits divergent evolution by favouring rare  
739 immigrants over residents. *Nature*. 2017;546: 285–288. doi:10.1038/nature22351
- 740 32. Nosil P, Villoutreix R, de Carvalho CF, Farkas TE, Soria-Carrasco V, Feder JL, et al.  
741 Natural selection and the predictability of evolution in Timemastick insects. *Science* (80- ).  
742 2018;359: 765–770. doi:10.1126/science.aap9125
- 743 33. Hori M. Frequency-Dependent Natural-Selection in the Handedness of Scale-Eating  
744 Cichlid Fish. *Science* (80- ). 1993;260: 216–219. doi:10.1126/science.260.5105.216
- 745 34. Sinervo B, Svensson E, Comendant T. Density cycles and an offspring quantity and  
746 quality game driven by natural selection. *Nature*. 2000;406: 985–8. doi:10.1038/35023149
- 747 35. Haller BC, Hendry AP. Solving the paradox of stasis: squashed stabilizing selection and  
748 the limits of detection. *Evolution* (N Y). 2014;68: 483–500. doi:10.1111/evo.12275
- 749 36. Polechová J, Barton NH. Speciation Through Competition□: a Critical Review Speciation  
750 Through Competition□: a Critical Review. 2005;59: 1194–1210. doi:10.1554/04-691
- 751 37. Baptestini EM, de Aguiar M a M, Bolnick DI, Araújo MS. The shape of the competition  
752 and carrying capacity kernels affects the likelihood of disruptive selection. *J Theor Biol*.  
753 2009;259: 5–11. doi:10.1016/j.jtbi.2009.02.023
- 754 38. Hansen TF, Pienaar J, Orzack SH. A comparative method for studying adaptation to a  
755 randomly evolving environment. *Evolution*. 2008;62: 1965–77. doi:10.1111/j.1558-  
756 5646.2008.00412.x
- 757 39. Grant PR, Grant BR. Unpredictable Evolution in a 30-Year Study of Darwin ’ s Finches.  
758 2002;296: 707–712.

- 759 40. Enquist B, Niklas K. Global allocation rules for patterns of biomass partitioning in seed  
760 plants. *Science* (80- ). 2002;22: 1571–1520.
- 761 41. Boucher F, Demery V. Inferring bounded evolution in phenotypic characters from  
762 phylogenetic comparative data. *Syst Biol*. 2016;In press. doi:10.1093/sysbio/syw015
- 763 42. Uyeda JC, Harmon LJ. A novel Bayesian method for inferring and interpreting the  
764 dynamics of adaptive landscapes from phylogenetic comparative data. *Syst Biol*. 2014;63:  
765 902–918. doi:10.1093/sysbio/syu057
- 766 43. O’Meara BC. Evolutionary Inferences from Phylogenies: A Review of Methods. *Annu*  
767 *Rev Ecol Evol Syst*. 2012;43: 267–285. doi:10.1146/annurev-ecolsys-110411-160331
- 768 44. Harmon LJ, Losos JB, Davies TJ, Gillespie RG, Gittleman JL, Jennings WB, et al. Early  
769 bursts of body size and shape evolution are rare in comparative data. *Evolution*. 2010;64:  
770 2385–2396. doi:10.1111/j.1558-5646.2010.01025.x
- 771 45. Butler MA, King AA. Phylogenetic comparative analysis: a modeling approach for  
772 adaptive evolution. *Am Nat*. 2004;164: 683–695. doi:10.1086/426002
- 773 46. Beaulieu J, O’Meara B. OUwie: an analysis of evolutionary rates in an OU framework. R  
774 package version 1; 2012.
- 775 47. Rabosky DL. Ecological Limits on Clade Diversification in Higher Taxa. *Am Nat*.  
776 2009;173: 662–674. doi:10.1086/597378
- 777 48. Harmon L, Andreazzi C, Debarre F, Drury J, Goldberg E, Martins A. Detecting the  
778 Macroevolutionary Signal of Species Interactions. *J Evol Biol*. 2019;In press.
- 779 49. Calsbeek R, Bonvini L, Box R. GEOGRAPHIC VARIATION, FREQUENCY-  
780 DEPENDENT SELECTION, AND THE MAINTENANCE OF A FEMALE-LIMITED  
781 POLYMORPHISM. *Evolution* (N Y). 2009;64: 116–125.

- 782 50. Schluter D, Columbia B, E-mail C. Frequency dependent natural selection during  
783 character displacement in sticklebacks. *Evolution*. 2003;57: 1142–50. Available:  
784 <http://www.ncbi.nlm.nih.gov/pubmed/12836830>
- 785 51. Martin CH. Context dependence in complex adaptive landscapes□: frequency and trait-  
786 dependent selection surfaces within an adaptive radiation of Caribbean pupfishes.  
787 *Evolution* (N Y). 2016; 1–18. doi:10.1111/evo.12932
- 788 52. Keagy J, Lettieri L, Boughman JW. Male competition fitness landscapes predict both  
789 forward and reverse speciation. *Ecol Lett*. 2015;19: 71–80. doi:10.1111/ele.12544
- 790 53. Seehausen O, Schluter D. Male-male competition and nuptial-colour displacement as a  
791 diversifying force in Lake Victoria cichlid fishes. *Proc Biol Sci*. 2004;271: 1345–53.  
792 doi:10.1098/rspb.2004.2737
- 793 54. Servedio MR, Burger R. The counterintuitive role of sexual selection in species  
794 maintenance and speciation. *Proc Natl Acad Sci*. 2014;111: 8113–8118.  
795 doi:10.1073/pnas.1316484111
- 796 55. Kopp M, Servedio MR, Mendelson TC, Safran RJ, Rodríguez RL, Hauber ME, et al.  
797 Mechanisms of Assortative Mating in Speciation with Gene Flow: Connecting Theory and  
798 Empirical Research. *Am Nat*. 2017;191: 000–000. doi:10.1086/694889
- 799 56. Martin CH, Wainwright PC. Multiple fitness peaks on the adaptive landscape drive  
800 adaptive radiation in the wild. *Science*. 2013;339: 208–211. doi:10.1126/science.1227710
- 801 57. Martin CH, Wainwright PC. Trophic novelty is linked to exceptional rates of  
802 morphological diversification in two adaptive radiations of *Cyprinodon* pupfishes.  
803 *Evolution*. 2011;65: 2197–212. doi:10.1111/j.1558-5646.2011.01294.x
- 804 58. Martin CH. The cryptic origins of evolutionary novelty: 1000□fold faster trophic

- 805 diversification rates without increased ecological opportunity or hybrid swarm. *Evolution*  
806 (N Y). 2016;70.11: 2504–2519. doi:<https://doi.org/10.1101/053140>
- 807 59. Nychka D, Furrer R, Paige J, Sain S. *fields: Tools for spatial data*. R Packag version 96.  
808 2017; doi:10.5065/D6W957CT
- 809 60. Mitchell-Olds T, Shaw. Regression analysis of natural selection: statistical inference and  
810 biological interpretation. *Evolution* (N Y). 1987;41: 1149–1161. Available:  
811 <http://www.jstor.org/stable/10.2307/2409084>
- 812 61. Schluter D, Nychka D. Exploring fitness surfaces. *Am Nat*. 1994;143: 597–616.  
813 Available: <http://www.jstor.org/stable/10.2307/2462902>
- 814 62. Morrissey MB. In search of the best methods for multivariate selection analysis. *Methods*  
815 *Ecol Evol*. 2014; n/a-n/a. doi:10.1111/2041-210X.12259
- 816 63. Gavrilets S. Evolution and speciation on holey adaptive landscapes. *Trends Ecol Evol*.  
817 1997;12: 307–312. doi:10.1016/S0169-5347(97)01098-7
- 818 64. Gavrilets S. *A Dynamical Theory of Speciation on Holey*. 1999;154.
- 819 65. Martin CH, Wainwright PC. On the measurement of ecological novelty: scale-eating  
820 pupfish are separated by 168 my from other scale-eating fishes. *PLoS One*. 2013;8:  
821 e711164. doi:10.1371/journal.pone.0071164
- 822 66. Martin CH, Wainwright PC. A remarkable species flock of *Cyprinodon* pupfishes  
823 endemic to San Salvador Island, Bahamas. *Bull Peabody Museum Nat Hist*. 2013;54:  
824 231–240. Available: <http://www.bioone.org/doi/abs/10.3374/014.054.0201>
- 825 67. McGirr JA, Martin CH. Novel candidate genes underlying extreme trophic specialization  
826 in Caribbean pupfishes. *Mol Biol Evol*. 2016; msw286. doi:10.1093/molbev/msw286
- 827 68. Uyeda JC, Hansen TF, Mcpeek a. The million-year wait for macroevolutionary bursts

- 828 Author ( s ): Josef C . Uyeda , Thomas F . Hansen , Stevan J . Arnold and Jason Pienaar
- 829 Source□: Proceedings of the National Academy of Sciences of the United States of
- 830 America , Stable URL□: <http://www.j.> 2011;108: 15908–15913. doi:10.5061/dryad.7d580
- 831 69. Landis MJ, Schraiber JG. Pulsed evolution shaped modern vertebrate body sizes. Proc
- 832 Natl Acad Sci USA. 2017;114: 13224–13229. doi:10.1073/pnas.1710920114
- 833 70. Estes S, Arnold SJ. Resolving the Paradox of Stasis: Models with Stabilizing Selection
- 834 Explain Evolutionary Divergence on All Timescales. Am Nat. 2007;169: 227–244.
- 835 doi:10.1086/510633
- 836 71. Martin CH, Feinstein LC. Novel trophic niches drive variable progress towards ecological
- 837 speciation within an adaptive radiation of pupfishes. Mol Ecol. 2014;23: 1846–62.
- 838 doi:10.1111/mec.12658
- 839 72. West RJD, Kodric-Brown A. Mate Choice by Both Sexes Maintains Reproductive
- 840 Isolation in a Species Flock of Pupfish ( Cyprinodon spp) in the Bahamas. Ethology.
- 841 2015;121: 793–800. doi:10.1111/eth.12394
- 842 73. Kodric-Brown a., West RJD. Asymmetries in premating isolating mechanisms in a
- 843 sympatric species flock of pupfish (Cyprinodon). Behav Ecol. 2013;25: 69–75.
- 844 doi:10.1093/beheco/art087
- 845 74. Gigord LD, Macnair MR, Smithson a. Negative frequency-dependent selection maintains
- 846 a dramatic flower color polymorphism in the rewardless orchid *Dactylorhiza sambucina*
- 847 (L.) Soo. Proc Natl Acad Sci U S A. 2001;98: 6253–5. doi:10.1073/pnas.111162598
- 848 75. Martin CH, Erickson PA, Miller CT. The genetic architecture of novel trophic specialists:
- 849 larger effect sizes are associated with exceptional oral jaw diversification in a pupfish
- 850 adaptive radiation. Mol Ecol. 2017;26: 624–638. doi:10.1111/mec.13935

- 851 76. St. John ME, Martin CH. Scale-eating specialists evolved adaptive feeding kinematics  
852 within a microendemic radiation of San Salvador Island pupfishes. *bioRxiv*. 2019;648451.
- 853 77. Fishman L, Stathos A, Beardsley PM, Williams CF, Hill JP. Chromosomal  
854 rearrangements and the genetics of reproductive barriers in *mimulus* (monkey flowers).  
855 *Evolution* (N Y). 2013;67: 2547–2560. doi:10.1111/evo.12154
- 856 78. Cutter AD. The polymorphic prelude to Bateson-Dobzhansky-Muller incompatibilities.  
857 *Trends Ecol Evol*. 2012;27: 209–18. doi:10.1016/j.tree.2011.11.004
- 858 79. Schumer M, Cui R, Powell DL, Dresner R, Rosenthal GG, Andolfatto P. High-resolution  
859 mapping reveals hundreds of genetic incompatibilities in hybridizing fish species. *Elife*.  
860 2014;3: 1–21. doi:10.7554/eLife.02535
- 861 80. Schumer M, Brandvain Y. Determining epistatic selection in admixed populations. *Mol*  
862 *Ecol*. 2016;25: 2577–2591. doi:10.1111/mec.13641
- 863 81. McGirr J, Martin C. Hybrid misexpression in multiple developing tissues within a recent  
864 adaptive radiation of *Cyprinodon* pupfishes. *bioRxiv*. 2019;372912.
- 865 82. McGirr J, Martin C. Ecological divergence in sympatry causes gene misregulation in  
866 hybrids. *bioRxiv*. 2019;717025.
- 867 83. Mack K, Nachman M. Gene regulation and speciation. *Trends Genet*. 2017;33: 68–80.
- 868 84. Mack K, Campbell P, Nachman M. Gene regulation and speciation in house mice.  
869 *Genome Res*. 2016;26: 451–461.
- 870 85. Ortiz-Barrientos D, Counterman B, Noor M. Gene expression divergence and the origin of  
871 hybrid dysfunctions. *Genetica*. 2007;129: 71–81.
- 872 86. Renaut S, Bernatchez L. Transcriptome-wide signature of hybrid breakdown associated  
873 with intrinsic reproductive isolation in lake whitefish species pairs (*Coregonus* spp.

- 874 Salmonidae). *Heredity* (Edinb). 2011;106: 1003–1011. doi:10.1038/hdy.2010.149
- 875 87. Renaut S, Nolte A, Bernatchez L. Gene expression divergence and hybrid misexpression  
876 between lake whitefish species pairs (*Coregonus* spp. Salmonidae). *Mol Biol Evol.*  
877 2009;26: 925–936.
- 878 88. Sazima I. Scale-eating in characoids and other fishes. *Environ Biol Fishes.* 1983;9: 87–  
879 101. doi:10.1007/BF00690855
- 880 89. Kolmann MA, Huie JM, Evans K, Summers AP. Specialized specialists and the narrow  
881 niche fallacy: A tale of scale-feeding fishes. *R Soc Open Sci.* 2018;5.  
882 doi:10.1098/rsos.171581
- 883 90. St. John ME, McGirr JA, Martin CH. The behavioral origins of novelty: did increased  
884 aggression lead to scale-eating in pupfishes? *Behav Ecol.* 2018;  
885 doi:10.1093/beheco/ary196
- 886 91. Grubh AR, Winemiller KO. Ontogeny of Scale Feeding in the Asian Glassfish, *Chanda*  
887 *nama* (Ambassidae). *Copeia.* 2004;2004: 903–907. doi:10.1643/CE-02-095R1
- 888 92. Janovetz J. Functional morphology of feeding in the scale-eating specialist *Catoprion*  
889 *mento*. *J Exp Biol.* 2005;208: 4757–4768. doi:10.1242/jeb.01938
- 890 93. Koblmüller S, Egger B, Sturmbauer C, Sefc KM. Evolutionary history of Lake  
891 Tanganyika’s scale-eating cichlid fishes. *Mol Phylogenet Evol.* 2007;44: 1295–305.  
892 doi:10.1016/j.ympev.2007.02.010
- 893 94. Raffini F, Meyer A. A comprehensive overview of the developmental basis and adaptive  
894 significance of a textbook polymorphism: head asymmetry in the cichlid fish *Perissodus*  
895 *microlepis*. *Hydrobiologia.* 2018;0123456789. doi:10.1007/s10750-018-3800-z
- 896 95. Peterson CC, Winemiller KO. Ontogenic diet shifts and scale-eating in *Roeboides dayi*, a

- 897 Neotropical characid. *Environ Biol Fishes*. 1997;49: 111–118.  
898 doi:10.1023/A:1007353425275
- 899 96. Gosavi S, Kharat S, Kumkar P, Navarange S. Interplay between behavior, morphology  
900 and physiology supports lepidophagy in the catfish *Pachypterus khavalchor* (Siluriformes:  
901 Horabagridae). *Zoology*. 2018;126: 185–191.
- 902 97. Sazima I, Zoologia D De, Campinas UE De, Paulo S. Scale-eating in characoids and other  
903 fishes. 1983;9.
- 904 98. St. John M, Martin C. Scale-eating specialists evolved adaptive feeding kinematics within  
905 a microendemic radiation of San Salvador Island pupfishes. *bioRxiv*. 2019;
- 906 99. Richards EJ, Martin CH. Adaptive introgression from distant Caribbean islands  
907 contributed to the diversification of a microendemic adaptive radiation of trophic  
908 specialist pupfishes. *PLoS Genet*. 2017;13: 1–35. doi:10.1371/journal.pgen.1006919
- 909 100. Gavrilets S, Li H, Vose MD. Rapid parapatric speciation on holey adaptive landscapes.  
910 *Proc Biol Sci*. 1998;265: 1483–9. doi:10.1098/rspb.1998.0461
- 911 101. Rohlf FJ. Comparative methods for the analysis of continuous variables: geometric  
912 interpretations. *Evolution*. 2001;55: 2143–60. Available:  
913 <http://www.ncbi.nlm.nih.gov/pubmed/11794776>
- 914 102. R Development Core Team. R: A Language and Environment for Statistical Computing. R  
915 Found Stat Comput Vienna Austria. 2016;0: {ISBN} 3-900051-07-0.  
916 doi:10.1038/sj.hdy.6800737
- 917 103. Warton D, Duursma R, Remko A, Falster D, S T. smatr 3 - an R package for estimation  
918 and inference about allometric lines. *Methods Ecol Evol*. 2012;3: 257–259.
- 919 104. Venables W, Ripley B. *Modern Applied Statistics with S*. Fourth Edi. Springer, New



- 920 York.; 2002.
- 921 105. Schemske DW, Bradshaw HD. Pollinator preference and the evolution of floral traits in  
922 monkeyflowers (*Mimulus*). Proc Natl Acad Sci U S A. 1999;96: 11910–5. Available:  
923 [http://www.pubmedcentral.nih.gov/articlerender.fcgi?artid=18386&tool=pmcentrez&rend](http://www.pubmedcentral.nih.gov/articlerender.fcgi?artid=18386&tool=pmcentrez&rendertype=abstract)  
924 [ertype=abstract](http://www.pubmedcentral.nih.gov/articlerender.fcgi?artid=18386&tool=pmcentrez&rendertype=abstract)
- 925 106. Morrissey M, Sakrejda K. gsg: an R package for inference of selection gradients. R  
926 Foundation for Statistical Computing; 2013.
- 927 107. Phillips PCPC, Arnold SJSJ. Visualizing multivariate selection. Evolution (N Y). 1989;43:  
928 1209–1222. doi:10.2307/2409357
- 929 108. Blows MW, Brooks R. Measuring Nonlinear Selection. 2003;162.
- 930 109. Wood S. Generalized Additive Models: An Introduction with R (2nd edition). Chapman  
931 and Hall; 2017.
- 932 110. Beygelzimer A, Kakadet S, Langford J, Arya S, Mount D, Li S. FNN: Fast Nearest  
933 Neighbor Search Algorithms and Applications. R Foundation for Statistical Computing;  
934 2019.
- 935 111. Stinchcombe JR, Agrawal AF, Hohenlohe P a, Arnold SJ, Blows MW. Estimating  
936 nonlinear selection gradients using quadratic regression coefficients: double or nothing?  
937 Evolution. 2008;62: 2435–40. doi:10.1111/j.1558-5646.2008.00449.x
- 938 112. Furness A, Reznick D. Convergent evolution of alternative developmental trajectories  
939 associated with diapause in African and South American killifish. Proceeding R Soc  
940 London Ser B. 2015;
- 941 113. Lavin A, McPhail J. Adaptive Divergence of Trophic Phenotype among Freshwater  
942 Populations of the Threespine Stickleback (*Gasterosteus aculeatus*). Can J Fish Aquat Sci.

943 1986;43: 2455–2463.

944

945

946

947

948

949

950

951

952

953

954

955

956 **Table 1.** Directional selection gradients ( $\beta$ ) and matrix of quadratic and correlational selection

957 gradients ( $\gamma$ ) on the two main ridge axes of selection estimated using generalized projection

958 pursuit regression on the 30-trait morphological dataset for each lake (frequency treatments

959 pooled based on model selection evidence).  $\beta$  and  $\gamma$  were estimated in separate regressions.

960 Directional selection gradients in bold were significant in a one-way logistic regression model

961 with fixed effects of ridge terms. Quadratic coefficients from the multiple regression model were

962 doubled to estimate quadratic selection gradients [111]. However, please note that a quadratic

963 approximation is inappropriate to model these highly nonlinear survival data [60].

964

| Lake 1 (Crescent Pond) |                           | $\gamma$                     |           |           |
|------------------------|---------------------------|------------------------------|-----------|-----------|
| <b>ppr ridge axis</b>  | <b><math>\beta</math></b> | <b><math>N = 1756</math></b> | <b>A1</b> | <b>A2</b> |

|                       |                           |                             |           |           |
|-----------------------|---------------------------|-----------------------------|-----------|-----------|
| A1                    | 0.095*****                |                             | -0.050    |           |
| A2                    | 0.005                     |                             | -0.026    | 0.030     |
| Lake 2 (Little Lake)  |                           |                             | $\gamma$  |           |
| <b>ppr ridge axis</b> | <b><math>\beta</math></b> | <b><math>N = 855</math></b> | <b>A1</b> | <b>A2</b> |
| A1                    | 0.126*****                |                             | .408      |           |
| A2                    | 0.052*                    |                             | .185      | .081      |

965 \*P < 0.05, \*\*P < 0.01, \*\*\*P < 0.001, \*\*\*\*\*P < 0.00001

966

967

968

969

970

971

972

973

974 **Table 2.** Model selection comparison of general additive models for survival and growth rate of

975 hybrids placed in field enclosures in both lakes. The best supported model is indicated first.

976 Notation is adopted from the mgcv package in R: s(LD1) indicates a smoothing spline fit to

977 discriminant axis one; tps (LD1, LD2) indicates a thin-plate spline fit to the two discriminant

978 axes; competitor distance indicates the Mahalanobis distance from each hybrid phenotype to the

979 mean phenotype within the 30-trait morphospace while accounting for trait correlations. Growth

980 rate models were only analyzed for lake 1 due to the low survival rates in lake 2.

| <b>model</b>                                               | <b>AIC</b> | <b><math>\Delta</math>AIC</b> |
|------------------------------------------------------------|------------|-------------------------------|
| survival ~ s(LD1) + s(LD2) + lake                          | 2033.095   | -                             |
| survival ~ tps(LD1, LD2) + s(LD1) + s(LD2) + lake          | 2033.096   | 0.001                         |
| survival ~ tps(LD1, LD2) + lake                            | 2042.247   | 9                             |
| survival ~ tps(LD1, LD2) + lake + competitor distance      | 2043.28    | 10                            |
| survival ~ tps(LD1, LD2) + lake + <b>treatment</b> + logSL | 2044.308   | 11                            |
| survival ~ tps(LD1, LD2) + lake + logSL                    | 2044.120   | 11                            |

|                                                                                                |           |      |
|------------------------------------------------------------------------------------------------|-----------|------|
| survival ~ tps(LD1, LD2) + lake + <b>treatment</b> + lake* <b>treatment</b> + logSL            | 2051.536  | 18   |
| survival ~ LD1 + LD2 + lake                                                                    | 2051.765  | 19   |
| survival ~ tps(LD1, LD2, by: lake)                                                             | 2298.805  | 266  |
| survival ~ tps(LD1, LD2, by: <b>treatment</b> )                                                | 2993.312  | 960  |
| survival ~ tps(LD1, LD2)                                                                       | 3034.863  | 1002 |
| log(growth) ~ s(LD1) + s(LD2) + logSL + <b>treatment</b> + competitor distance                 | -3226.596 | -    |
| log(growth) ~ tps(LD1, LD2) + s(LD1) + s(LD2) + logSL + <b>treatment</b> + competitor distance | -3226.596 | -    |
| log(growth) ~ s(LD1) + s(LD2) + logSL + <b>treatment</b>                                       | -3214.575 | 12   |
| log(growth) ~ tps(LD1, LD2) + logSL + <b>treatment</b>                                         | -3208.659 | 18   |
| log(growth) ~ s(LD1) + s(LD2) + logSL + competitor distance                                    | -3160.196 | 67   |
| log(growth) ~ s(LD1) + s(LD2) + logSL                                                          | -3145.952 | 81   |
| log(growth) ~ tps(LD1, LD2) + s(LD1) + s(LD2) + logSL                                          | -3145.952 | 81   |
| log(growth) ~ LD1 + LD2 + logSL                                                                | -3131.850 | 95   |
| log(growth) ~ LD1 + LD2                                                                        | -2830.445 | 396  |

981

982

983

984

985 **Table 3.** Model selection comparison of general additive models for survival and growth rate of  
 986 hybrids placed in field enclosures in both lakes for the first two major axes of selection (A1 and  
 987 A2) estimated using generalized projection pursuit projection. The best supported model is  
 988 indicated first. Notation is adopted from the mgcv package in R: s(A1) indicates a smoothing  
 989 spline fit to ridge axis one; tps (A1, A2) indicates a thin-plate spline fit to the two ridges;  
 990 competitor distance indicates the Mahalanobis distance from each hybrid phenotype to the mean  
 991 phenotype within the 30-trait morphospace while accounting for trait correlations.

| lake               | model                                                               | AIC       | ΔAIC |
|--------------------|---------------------------------------------------------------------|-----------|------|
| lake 1             | survival ~ s(A1) + s(A2)                                            | 1819.724  | -    |
| (Crescent<br>Pond) | survival ~ s(A1) + s(A2) + <b>treatment</b>                         | 1820.595  | 0.87 |
|                    | survival ~ tps(A1,A2) + <b>treatment</b>                            | 1820.595  | 0.87 |
|                    | survival ~ A1 + A2 + <b>treatment</b>                               | 1820.594  | 0.87 |
|                    | survival ~ s(A1) + s(A2) + tps(A1,A2) + <b>treatment</b>            | 1821.649  | 2    |
|                    | survival ~ s(A1) + s(A2) + <b>treatment</b> + competitor distance   | 1822.595  | 3    |
|                    | log(growth) ~ s(A1) + s(A1) + logSL + <b>treatment</b> + competitor | -3230.104 | -    |

---

|                            |                                                                                       |           |     |
|----------------------------|---------------------------------------------------------------------------------------|-----------|-----|
|                            | distance                                                                              |           |     |
|                            | $\log(\text{growth}) \sim s(A1) + s(A1) + \log\text{SL} + \text{treatment}$           | -3226.259 | 3.8 |
|                            | $\log(\text{growth}) \sim s(A1) + s(A1) + \log\text{SL} + \text{competitor distance}$ | -3185.980 | 44  |
|                            | $\log(\text{growth}) \sim s(A1) + s(A1) + \log\text{SL}$                              | -3180.214 | 50  |
| lake 2<br>(Little<br>Lake) | $\text{survival} \sim s(A1) + s(A2)$                                                  | 108.7232  | -   |
|                            | $\text{survival} \sim s(A1) + s(A2) + \text{treatment}$                               | 110.4928  | 1.8 |
|                            | $\text{survival} \sim s(A1) + s(A2) + \text{tps}(A1,A2) + \text{treatment}$           | 110.4925  | 1.8 |
|                            | $\text{survival} \sim \text{tps}(A1,A2) + \text{treatment}$                           | 110.4927  | 1.8 |
|                            | $\text{survival} \sim A1 + A2 + \text{treatment}$                                     | 110.4921  | 1.8 |
|                            | $\text{survival} \sim s(A1) + s(A2) + \text{treatment} + \text{competitor distance}$  | 110.6482  | 1.9 |

---

992

993

994

995

996

997

998 **Fig. 1**

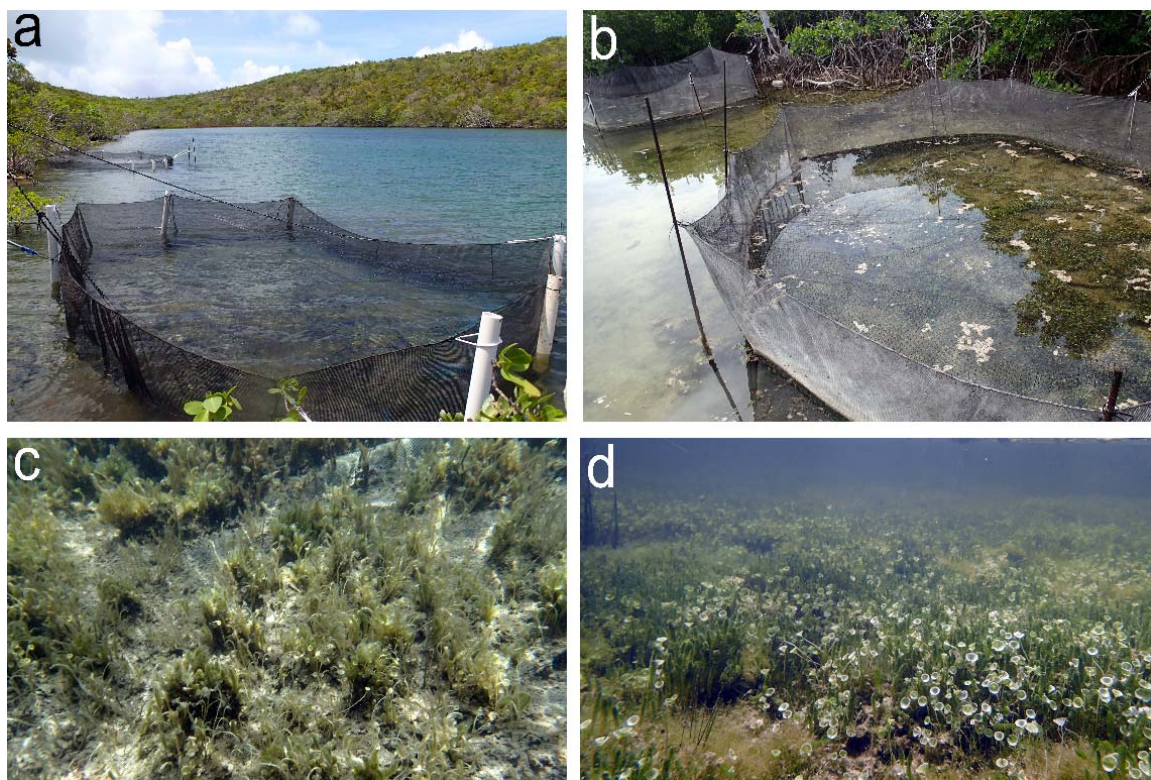

999

1000 **Fig. 1 High- and low-frequency field enclosures** and the associated benthic macroalgae  
1001 communities inside each enclosure typical of surrounding littoral zone habitats in lake 1 (*a,c*:  
1002 Crescent Pond) and lake 2 (*b,d*: Little Lake) after 3 month and 11 month field exposure periods,  
1003 respectively.

1004

1005

1006

1007

1008

1009

1010

1011 **Fig. 2**

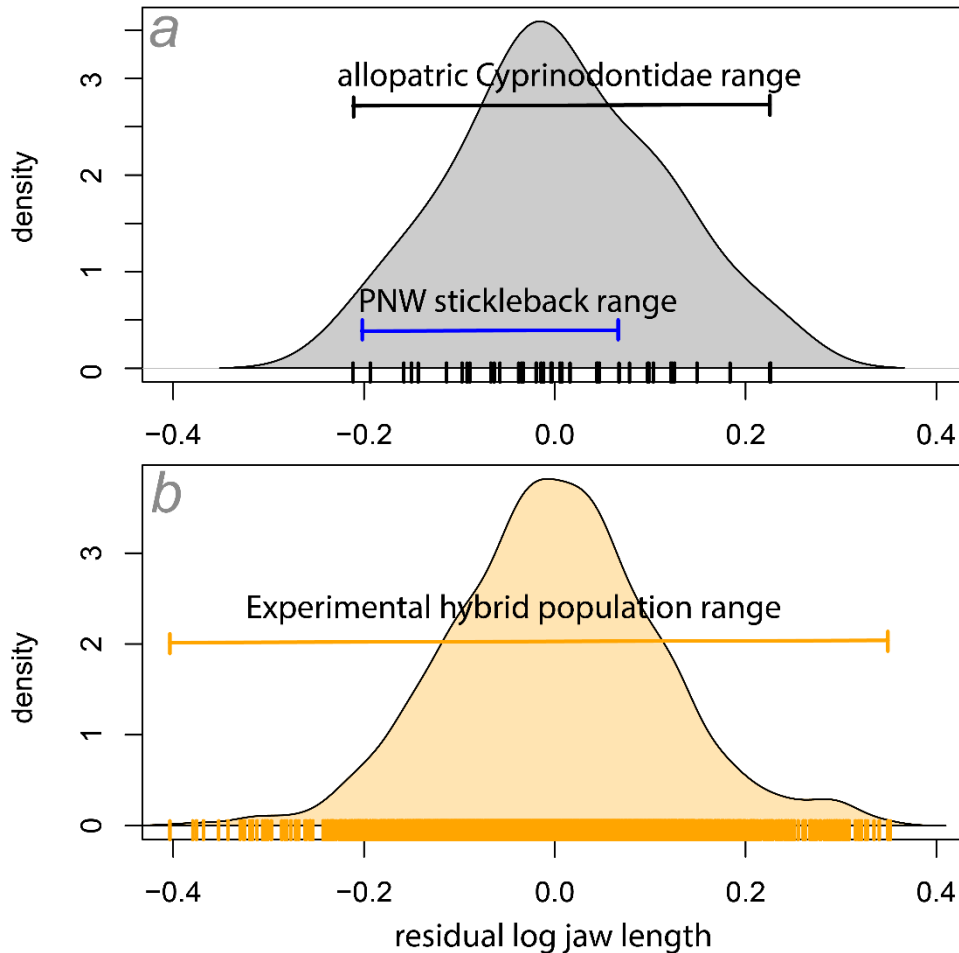

1012

1013 **Fig. 2 Residual jaw length variation in a) allopatric Cyprinodontidae species (grey)**

1014 diverging over 20 million years ago ([112]; data from [57]) and b) lab-reared F4/F5 hybrid

1015 populations (orange) measured from the field experiment in this study. The minimum and

1016 maximum residual upper jaw lengths across allopatric stickleback populations in the Pacific

1017 Northwest (PNW; data from Fig. 1 reported in [113]) are also included for comparison. Each a)

1018 species mean or b) individual F4/F5 hybrid is represented as tick marks on the x-axis plus

1019 density plots as an estimate of residual variation. Residuals were calculated from a linear

1020 regression of log-transformed lower jaw length on log-transformed standard length without mean

1021 and variance standardization for comparison on the same absolute scale across all three studies.

1022 **Fig. 3**

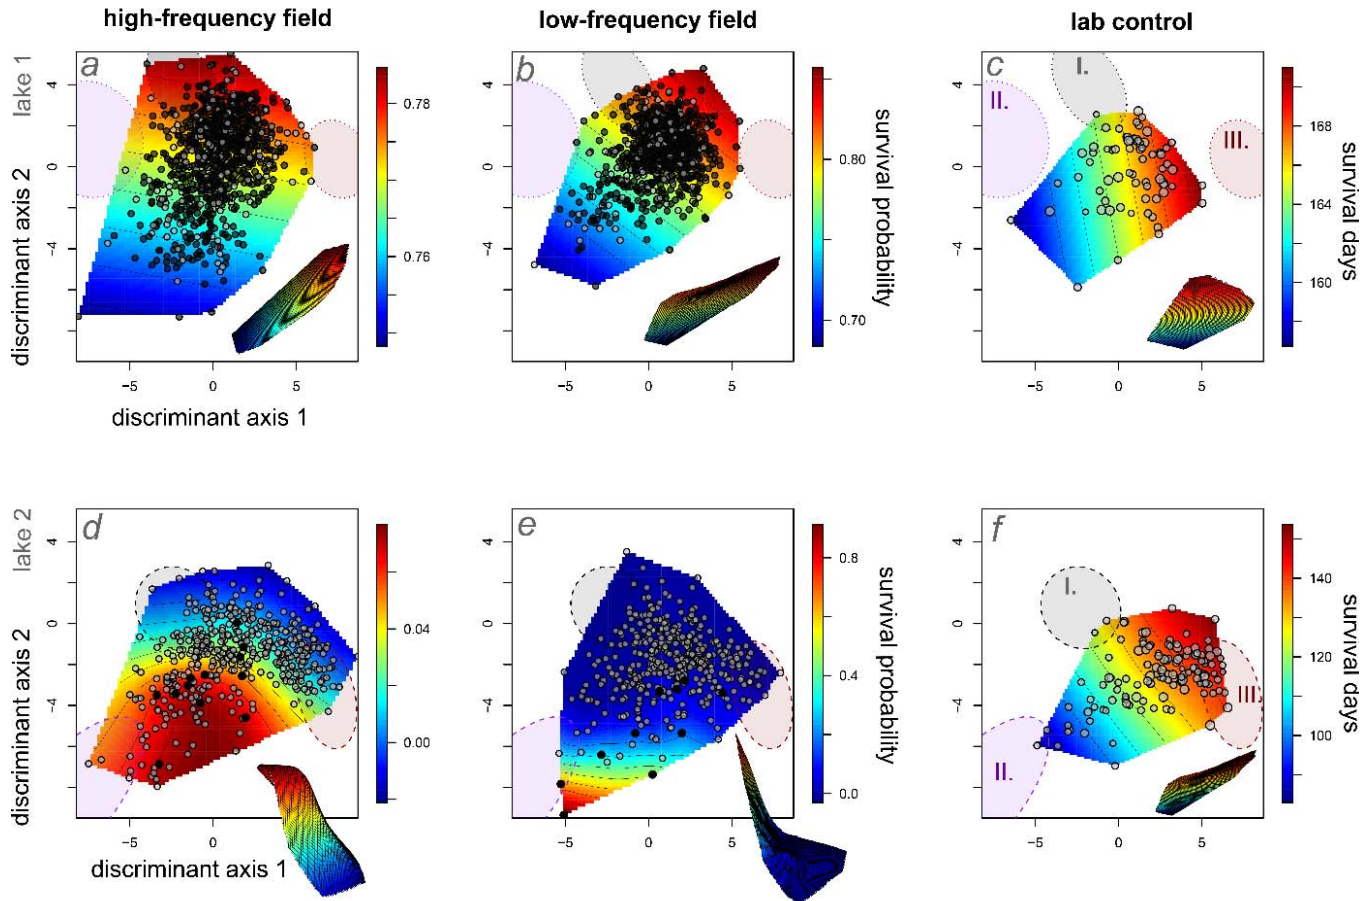

1023

1024 **Fig. 3 Survival fitness landscapes for hybrid populations in high- (first column) and low-**  
1025 **frequency (second column) field enclosures and laboratory controls (third column).** Thin-  
1026 plate splines predict the probability of survival (heat color) across a single linear discriminant  
1027 morphospace separating generalist and scale-eater phenotypes (x-axis: LD1) and generalist and  
1028 molluscivore phenotypes (y-axis: LD2). Survivors in field enclosures are depicted in black  
1029 relative to deaths over the 3-month and 1-year exposure periods, respectively. Laboratory control  
1030 points are proportional to the number of days each hybrid survived within 151-liter aquaria. All  
1031 hybrids are plotted within a shared linear discriminant morphospace calculated from lab-reared  
1032 F1 individuals of parental populations in both lakes (first row: lake 1; second row: lake 2). 95%



1033 confidence ellipses for each parental population in each lake are shown for generalists (I. grey),

1034 molluscivores (II. purple), and scale-eaters (III. red).

1035

1036

1037

1038

1039

1040

1041

1042

1043

1044

1045

1046

1047

1048

1049

1050

1051

1052

1053

1054

1055

1056 **Fig. 4**

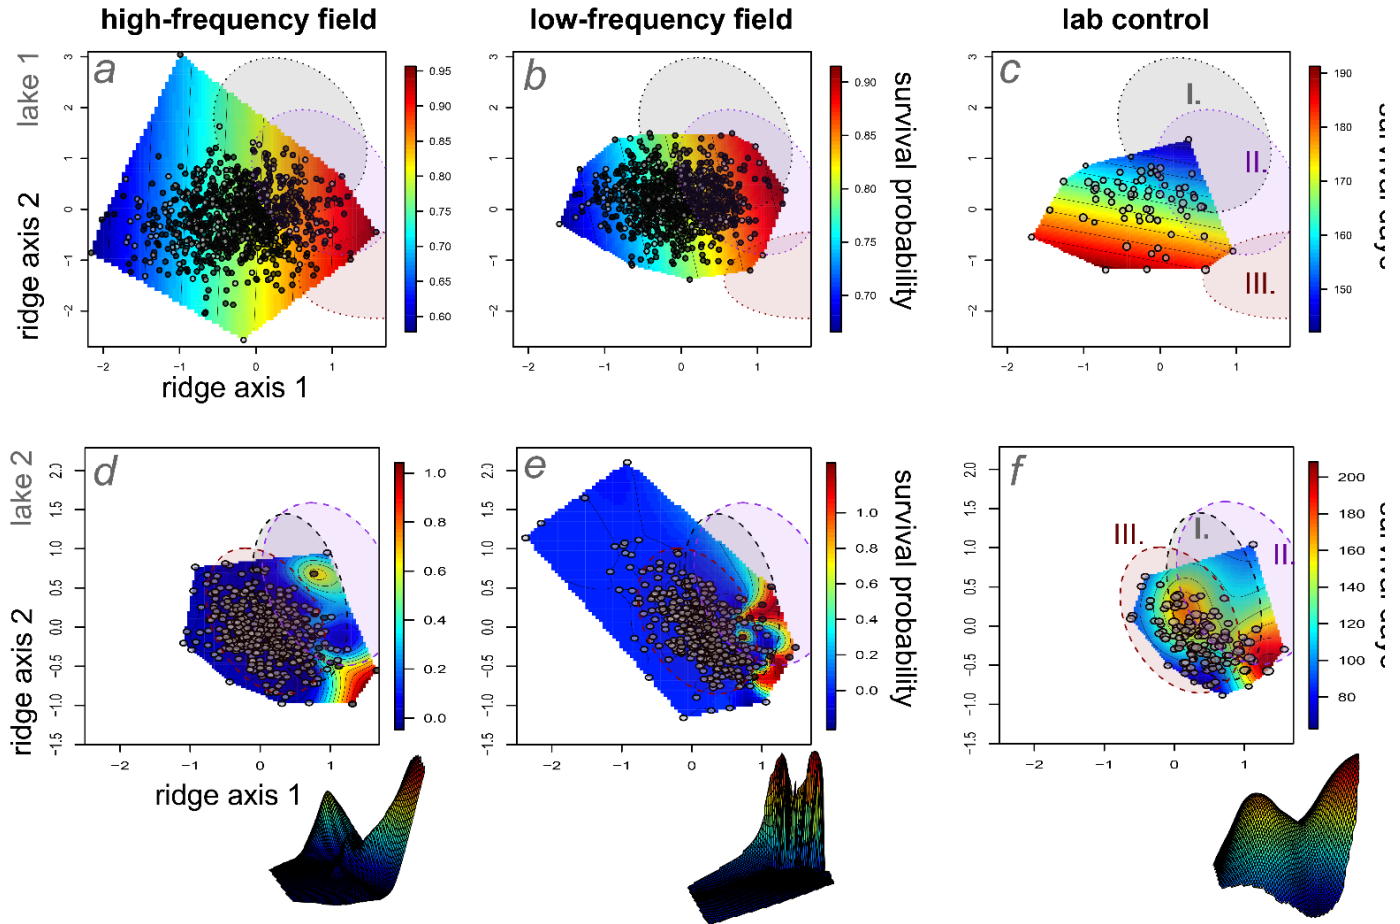

1057

1058 **Fig. 4 Survival fitness landscapes for hybrid populations in high- (first column) and low-**  
1059 **frequency (second column) field enclosures and laboratory controls (third column) across**  
1060 **the two major ridge axes of selection within the 30-trait morphospace.** Thin-plate splines  
1061 predict the probability of survival (heat color) across the two major ridge axes associated with  
1062 survival (Table S3-4), estimated separately for lake 1 (first row) and lake 2 (second row) hybrid  
1063 populations using generalized projection pursuit regression. Survivors in field enclosures are  
1064 depicted in black relative to deaths over the 3-month (first row) and 1-year (second row)  
1065 exposure periods, respectively. Laboratory control points (third column) are proportional to the  
1066 number of days each hybrid survived within 151-liter aquaria. 95% confidence ellipses for each

1067 parental population in each lake are shown for generalists (I. grey), molluscivores (II. purple),  
1068 and scale-eaters (III. red).

1069

1070

1071

1072

1073

1074

1075

1076

1077

1078

1079

1080

1081

1082

1083

1084

1085

1086

1087

1088

1089

1090 **Fig. 5**

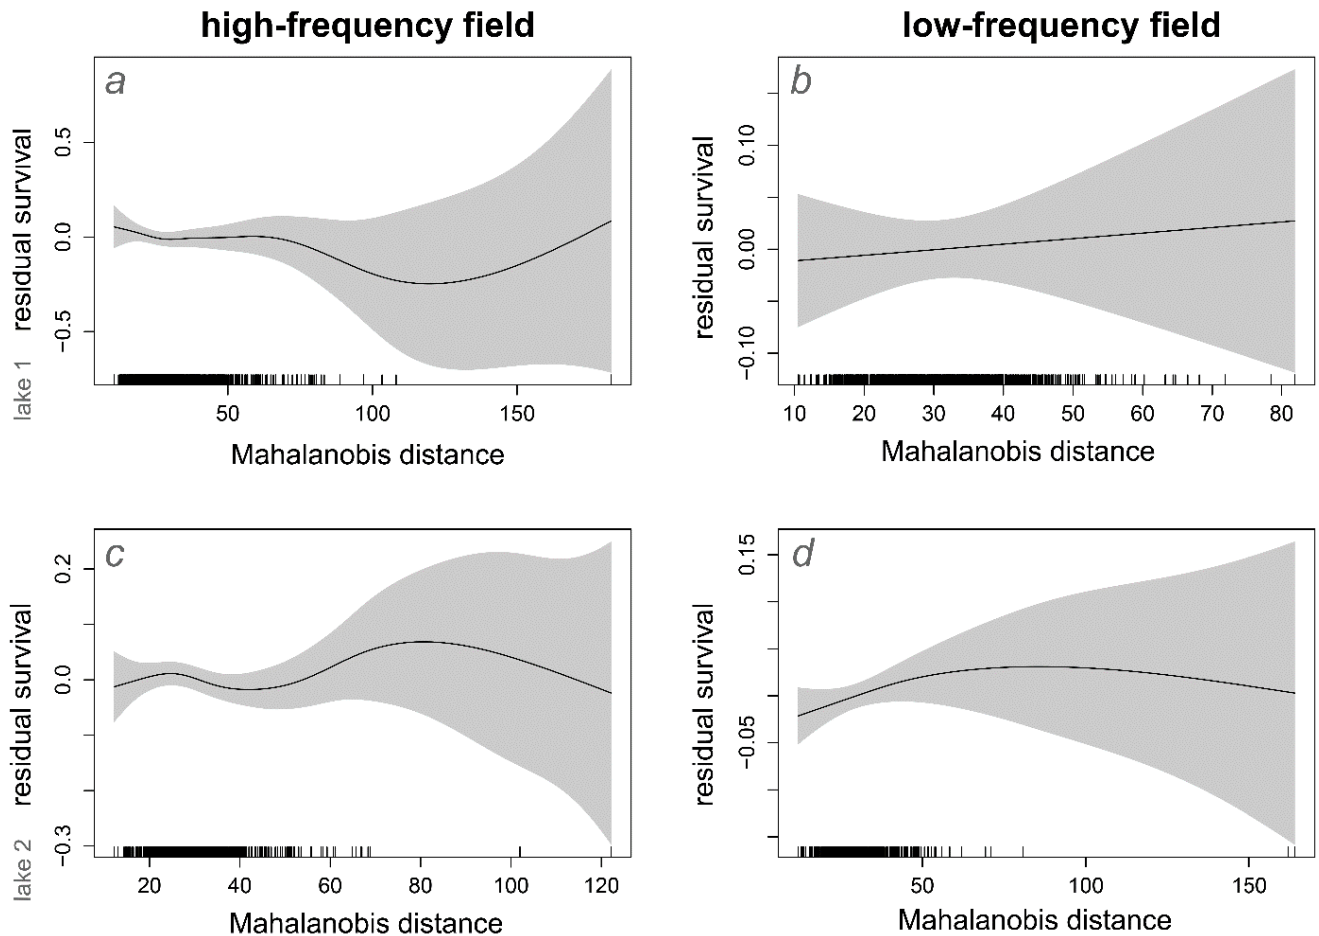

1091

1092 **Fig. 5 Residual survival probability relative to the density of similar hybrid phenotypes in**

1093 **high- (first column) and low-frequency (second column) field enclosures in each lake.**

1094 Residuals calculated from the survival probability not explained by the thin-plate splines

1095 estimated for hybrid phenotype in the discriminant morphospace (Fig. 2). The frequency of

1096 similar hybrid phenotypes was calculated for each hybrid from Mahalanobis distance to the mean

1097 hybrid phenotype within the full 30-trait hybrid morphospace account for trait correlations.

1098 Similar patterns were found using sum of the nearest-neighbor Euclidean distances to the ten

1099 most similar hybrid phenotypes in the full 30-trait morphospace (Fig. S5).

1100

1101 **Fig. 6**

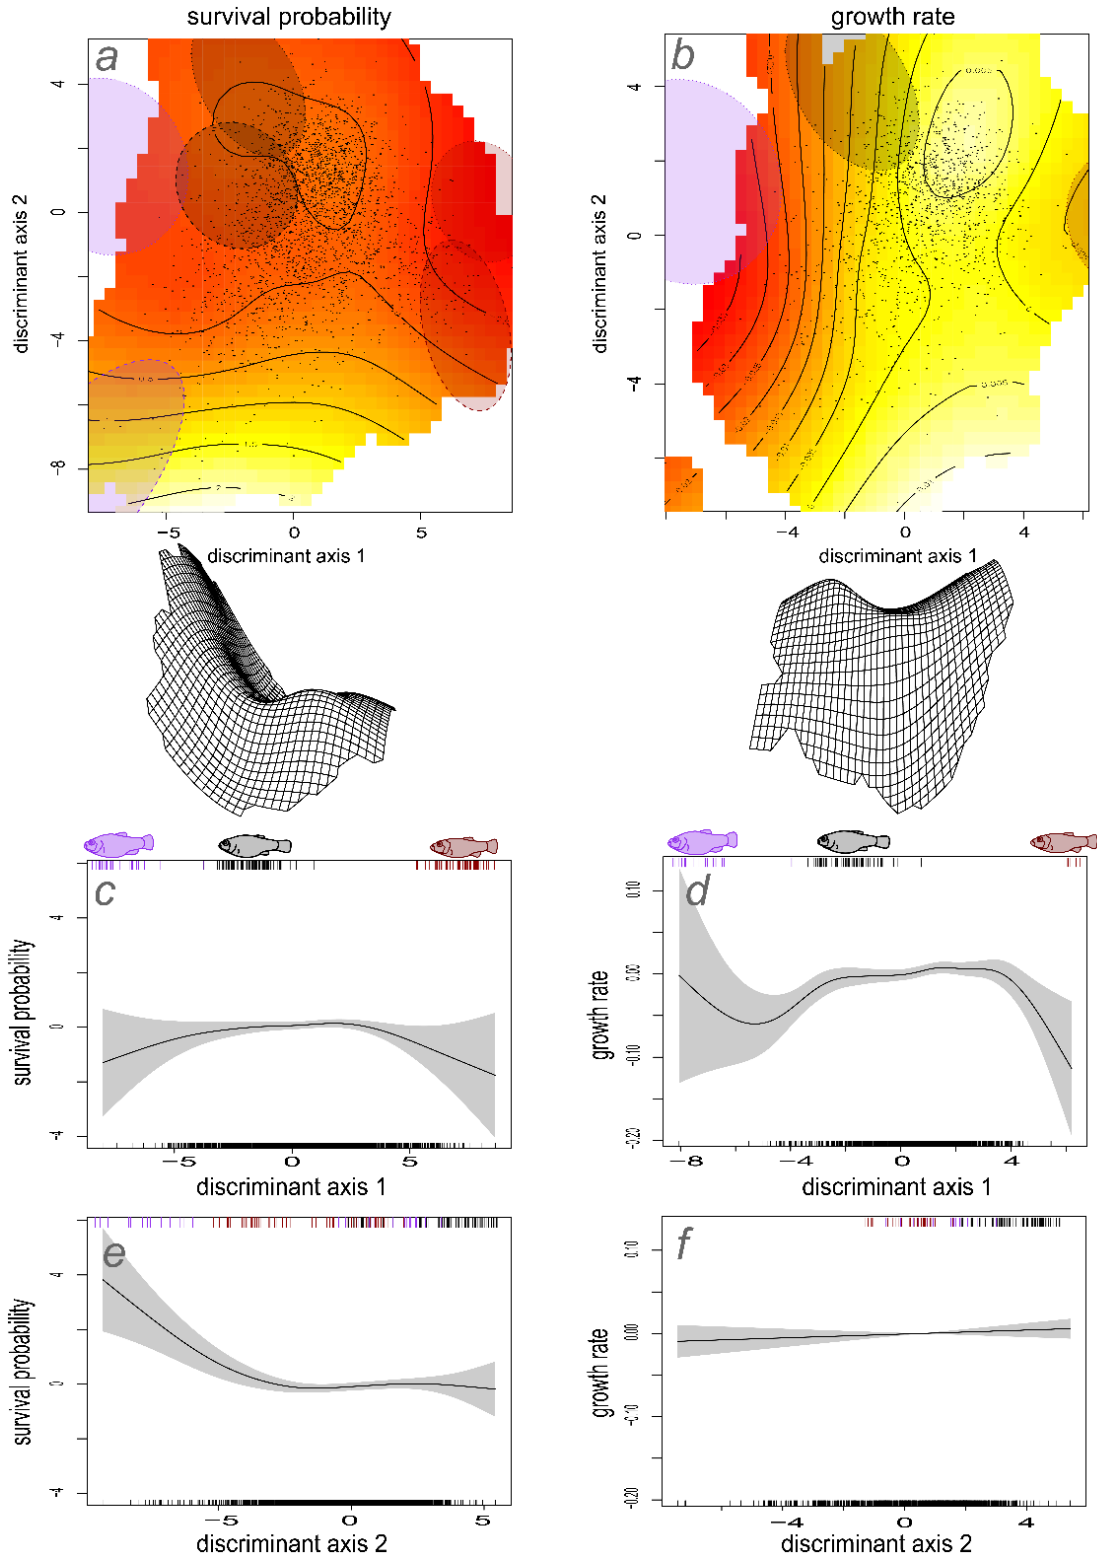

1102

1103 **Fig. 6 Joint survival (first column) and growth (second column) fitness landscapes**  
1104 **estimated across treatments and lake environments using generalized additive modeling.**  
1105 Thin-plate splines estimate the probability of *a*) survival controlling for lake and treatment  
1106 effects across all four enclosures and *b*) growth rate controlling for treatment effects in lake 1  
1107 (lake 2 was excluded due to low survival rates). Thin-plate splines and smoothing splines ( $\pm 1$   
1108 SE) are depicted within the linear discriminant morphospace separating generalist and scale-eater  
1109 phenotypes (x-axis: LD1) and generalist and molluscivore phenotypes (y-axis: LD2) calculated  
1110 from laboratory-reared individuals of parental populations in both lakes. 95% confidence ellipses  
1111 show the location of generalist (grey), molluscivore (purple), and scale-eater (red) parental  
1112 populations from lake 1 (small dashed line) and lake 2 (large dashed line). All hybrids are  
1113 represented by points or tick marks on the x-axis and parental individuals are represented by tick  
1114 marks on the upper margin.

1115

1116

1117

1118

1119

1120

1121

1122

1123

1124

1125

1126 **Fig. 7**

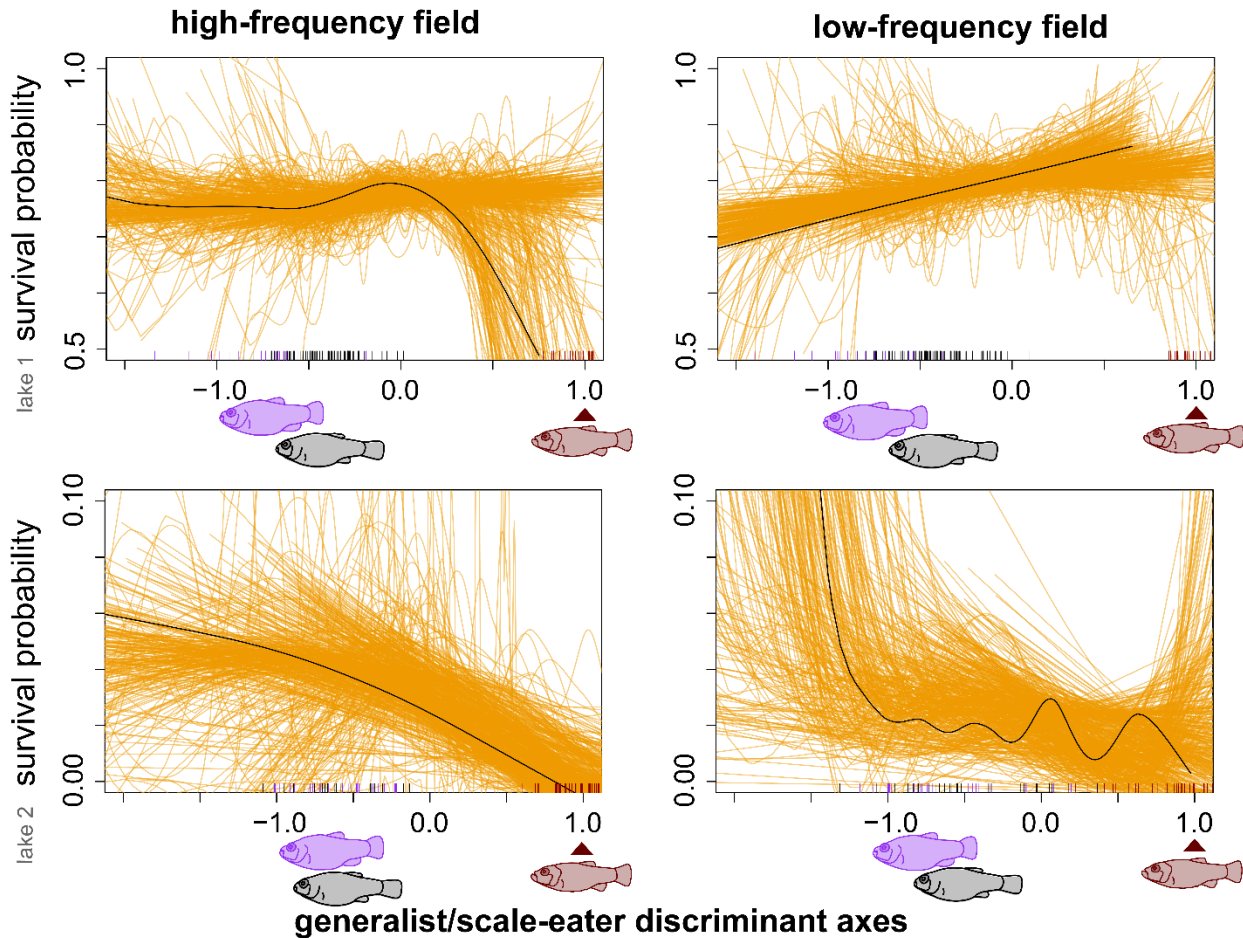

1127

1128 **Fig. 7 Spaghetti plots illustrate all possible fitness paths between generalist and scale-eater**

1129 **hybrid phenotypes in high- (first column) and low-frequency (second column) field**

1130 **enclosures.** Each orange line depicts the relationship between survival and a random

1131 discriminant axis separating generalist and scale-eater phenotypes estimated from generalized

1132 cross-validation of a smoothing spline for 500 random subsets of 15 size-corrected traits (out of

1133 30); the black line illustrates the smoothing spline estimated for a discriminant axis from all 30

1134 traits, the grey lines illustrate the smoothing spline estimated for each subset. Each subsampled

1135 discriminant axis was rescaled to the mean parental scale-eater phenotype = 1 (red arrows).

1136 Parental phenotypes are illustrated as black (generalist), purple (molluscivore), and red (scale-  
1137 eater) tick marks on the x-axis.

1138

1139

1140

1141

1142

1143

1144

1145

1146

1147

1148

1149

1150

1151

1152

1153

1154

1155

1156

1157

1158



1159 **Table S1.** Sample sizes for high-frequency and low-frequency field enclosures and laboratory  
1160 controls for each lake hybrid population.

| <b>lake</b>   | <b>exposure period</b> | <b>high-frequency treatment survivors / total</b> | <b>low-frequency treatment survivors / total</b> | <b>control</b> |
|---------------|------------------------|---------------------------------------------------|--------------------------------------------------|----------------|
| Crescent Pond | 3 months               | 712 / 923; 77.1%                                  | 662 / 883; 75.0%                                 | 69             |
| Little Lake   | 11 months              | 12 / 842; 1.4%                                    | 10 / 819; 1.2%                                   | 130            |

1161

1162

1163

1164

1165

1166

1167

1168

1169

1170

1171

1172

1173

1174

1175

1176

1177

1178

1179 **Table S2.** Trait loadings on the two linear discriminant axes maximizing phenotypic separation  
1180 among F1 lab-reared individuals of the three parental species from both lakes. Numbered  
1181 landmarks correspond to illustrations of linear distances and angles in Fig. S3.

| trait | trait           | LD1   | LD2   |
|-------|-----------------|-------|-------|
|       | cranialwidth    | -0.10 | 0.00  |
|       | innereyetosnout | -0.33 | 0.28  |
|       | suspensorium    | 0.74  | 0.37  |
|       | dorsalsnoutlen  | 0.11  | -0.37 |
|       | adductorht      | 0.22  | -0.23 |
|       | jawlen          | 1.07  | -0.19 |
|       | ad2pect         | -0.07 | 0.16  |
|       | pmxlen          | 0.52  | -0.38 |
|       | foreeyewidth    | 0.17  | -0.42 |
|       | bodydepth       | 0.10  | -0.27 |
|       | dorsaltocaudal  | -0.12 | 0.01  |
|       | headht          | 0.55  | -0.53 |
|       | analtocaudal    | -0.29 | -0.07 |
|       | caudalpedht     | -0.19 | 0.29  |
|       | pmx2add         | -0.76 | 0.49  |
|       | jaw2pect        | -0.10 | -0.07 |
|       | snoutlen        | 0.69  | -0.19 |
|       | foresnout       | -0.64 | 0.26  |
|       | eyewidth        | 0.01  | 0.04  |
|       | eyetosnout      | 0.29  | 0.71  |
|       | headwidth       | -0.11 | 0.23  |
|       | nose            | -1.06 | -1.61 |
|       | hindeyewidth    | -0.12 | 0.03  |
|       | eyeht           | -0.76 | -0.11 |
|       | topeyeangle     | 0.35  | 0.43  |
|       | lowereyeangle   | -0.23 | 0.68  |
|       | nasalangle      | 0.49  | 0.01  |
|       | headlen         | 0.02  | -1.07 |
|       | bellylen        | -0.44 | 0.3   |
|       | pectinsertion   | -0.19 | -0.19 |
|       | buccalwidth     | 0.16  | 0.3   |

1182

1183

1184

1185

1186 **Table S3.** Trait loadings on the two ridge axes most strongly associated with survival probability  
 1187 within the Crescent Pond high and low-frequency field enclosures estimated using generalized  
 1188 projection pursuit regression. Numbered landmarks correspond to illustrations of linear distances  
 1189 and angles in Fig. S3.

| trait                            | trait              | ridge axis 1 (A1) | ridge axis 2 (A2) |
|----------------------------------|--------------------|-------------------|-------------------|
| 1. nasal protrusion              | 1. nose            | -0.02             | 0.06              |
| 2. interorbital width            | 2. cranialwidth    | 0.2               | 0.02              |
| 3. orbit to premaxilla           | 3. innereyetosnout | 0.27              | 0.22              |
| 4. suspensorium length           | 4. suspensorium    | -0.24             | 0.23              |
| 5. dorsal facial length          | 5. dorsalsnoutlen  | -0.26             | -0.22             |
| 6. adductor height               | 6. adductorht      | 0.26              | -0.03             |
| 7. lower jaw length              | 7. jawlen          | 0.21              | 0.42              |
| 8. subopercle to pectoral girdle | 8. ad2pect         | -0.11             | -0.26             |
| 9. premaxilla length             | pmxlen             | -0.25             | -0.31             |
| 10. jaw joint to orbit           | foreeyewidth       | 0.36              | 0.04              |
| 11. body depth                   | bodydepth          | 0.15              | 0.09              |
| 12. dorsal to caudal distance    | dorsaltocaudal     | -0.18             | 0.01              |
| 13. head height                  | headht             | 0.17              | -0.35             |
| 14. anal to caudal distance      | analtocaudal       | -0.02             | 0.1               |
| 15. caudal peduncle height       | caudalpedht        | -0.11             | 0.17              |
| 16. lateral skull length         | pmx2add            | -0.13             | -0.17             |
| 17. upper jaw to pectoral girdle | jaw2pect           | -0.05             | 0.15              |
| 18. lateral facial length        | snoutlen           | 0.05              | -0.2              |
| 19. nasal length                 | foresnout          | -0.02             | -0.06             |
| 20. horizontal orbit diameter    | eyewidth           | -0.07             | -0.08             |
| 21. adductor to premaxilla       | eyetosnout         | -0.09             | 0.14              |
| 22. max. neurocranium width      | headwidth          | 0.05              | 0.13              |
| 23. orbital neurocranium width   | hindeyewidth       | -0.12             | -0.02             |
| 24. vertical orbit diameter      | eyeht              | 0.13              | 0.23              |
| 25. premaxilla to orbit angle    | topeyeangle        | -0.23             | 0.14              |
| 26. premaxilla to adductor angle | lowereyeangle      | -0.16             | 0.24              |
| 27. nasal protrusion anagle      | nasalangle         | 0.06              | 0.18              |
| 28. neurocranium to premaxilla   | headlen            | -0.2              | -0.15             |
| 29. orbit to anal fin insertion  | bellylen           | -0.22             | 0.03              |
| 30. pectoral fin insertion width | pectinsertion      | -0.25             | -0.04             |
| 31. gape width                   | buccalwidth        | -0.23             | -0.12             |

1190

1191

1192 **Table S4.** Trait loadings on the two ridge axes most strongly associated with survival probability  
 1193 within the Little Lake (lake 2) high and low-frequency field enclosures estimated using  
 1194 generalized projection pursuit regression. Numbered landmarks correspond to illustrations of  
 1195 linear distances and angles in Fig. S3.

| trait                            | trait           | ridge axis 1 (A1) | ridge axis 2 (A2) |
|----------------------------------|-----------------|-------------------|-------------------|
| 1. nasal protrusion              | nose            | 0.18              | -0.02             |
| 2. interorbital width            | cranialwidth    | -0.07             | 0.14              |
| 3. orbit to premaxilla           | innereyetosnout | -0.08             | 0.24              |
| 4. suspensorium length           | suspensorium    | -0.19             | 0.12              |
| 5. dorsal facial length          | dorsalsnoutlen  | 0.2               | -0.33             |
| 6. adductor height               | adductorht      | 0                 | 0.01              |
| 7. lower mandible length         | jawlen          | -0.26             | 0.11              |
| 8. subopercle to pectoral girdle | ad2pect         | -0.13             | 0.02              |
| 9. premaxilla length             | pmxlen          | 0.13              | -0.04             |
| 10. jaw joint to orbit           | foreeyewidth    | -0.05             | 0.19              |
| 11. body depth                   | bodydepth       | -0.03             | 0.15              |
| 12. dorsal to caudal distance    | dorsaltocaudal  | 0.03              | -0.17             |
| 13. head height                  | headht          | 0.04              | -0.07             |
| 14. anal to caudal distance      | analtocaudal    | -0.07             | -0.18             |
| 15. caudal peduncle height       | caudalpedht     | -0.05             | -0.15             |
| 16. lateral skull length         | pmx2add         | -0.23             | 0.22              |
| 17. upper jaw to pectoral girdle | jaw2pect        | 0.34              | -0.43             |
| 18. lateral facial length        | snoutlen        | -0.17             | 0.19              |
| 19. nasal length                 | foresnout       | 0.03              | -0.05             |
| 20. horizontal orbit diameter    | eyewidth        | 0                 | 0.08              |
| 21. adductor to premaxilla       | eyetosnout      | -0.23             | 0.22              |
| 22. max. neurocranium width      | headwidth       | 0.08              | -0.08             |
| 23. orbital neurocranium width   | hindeyewidth    | 0.15              | -0.12             |
| 24. vertical orbit diameter      | eyeht           | 0.25              | -0.19             |
| 25. premaxilla to orbit angle    | topeyeangle     | -0.51             | 0.47              |
| 26. premaxilla to adductor angle | lowereyeangle   | -0.26             | 0.13              |
| 27. nasal protrusion anagle      | nasalangle      | 0.02              | 0.01              |
| 28. neurocranium to premaxilla   | headlen         | 0.21              | 0.02              |
| 29. orbit to anal fin insertion  | bellylen        | 0.03              | -0.12             |
| 30. pectoral fin insertion width | pectinsertion   | 0.12              | 0.04              |
| 31. gape width                   | buccalwidth     | -0.19             | 0.01              |

1196

1197

1198

1199 **Fig. S1**

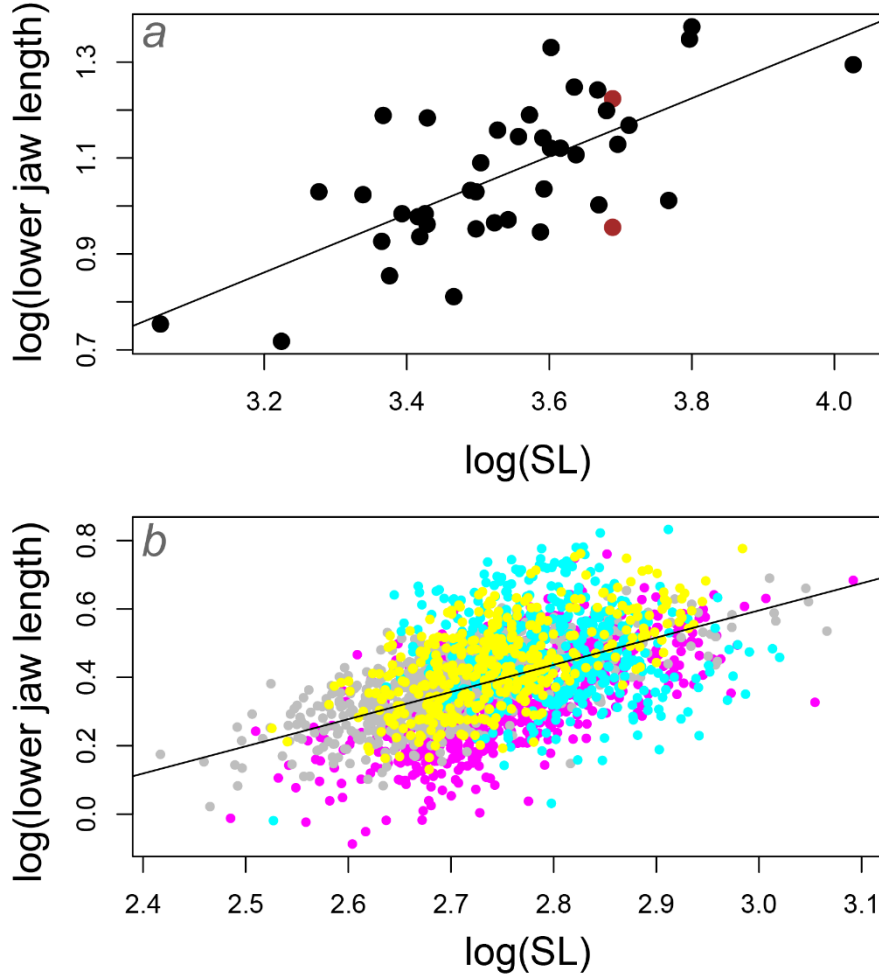

1200

1201 **Fig. S1** Log-transformed lower jaw length versus log-transformed standard length for *a*)  
1202 allopatric Cyprinodontidae species (black) and *b*) hybrid populations (one color per treatment)  
1203 used in this study. The minimum and maximum upper jaw lengths of allopatric stickleback  
1204 populations in the Pacific Northwest are also shown for reference (brown). Analyses of data  
1205 published in [57] and Fig. 1 reported in [113].

1206

1207

1208

1209

1210 **Fig. S2**

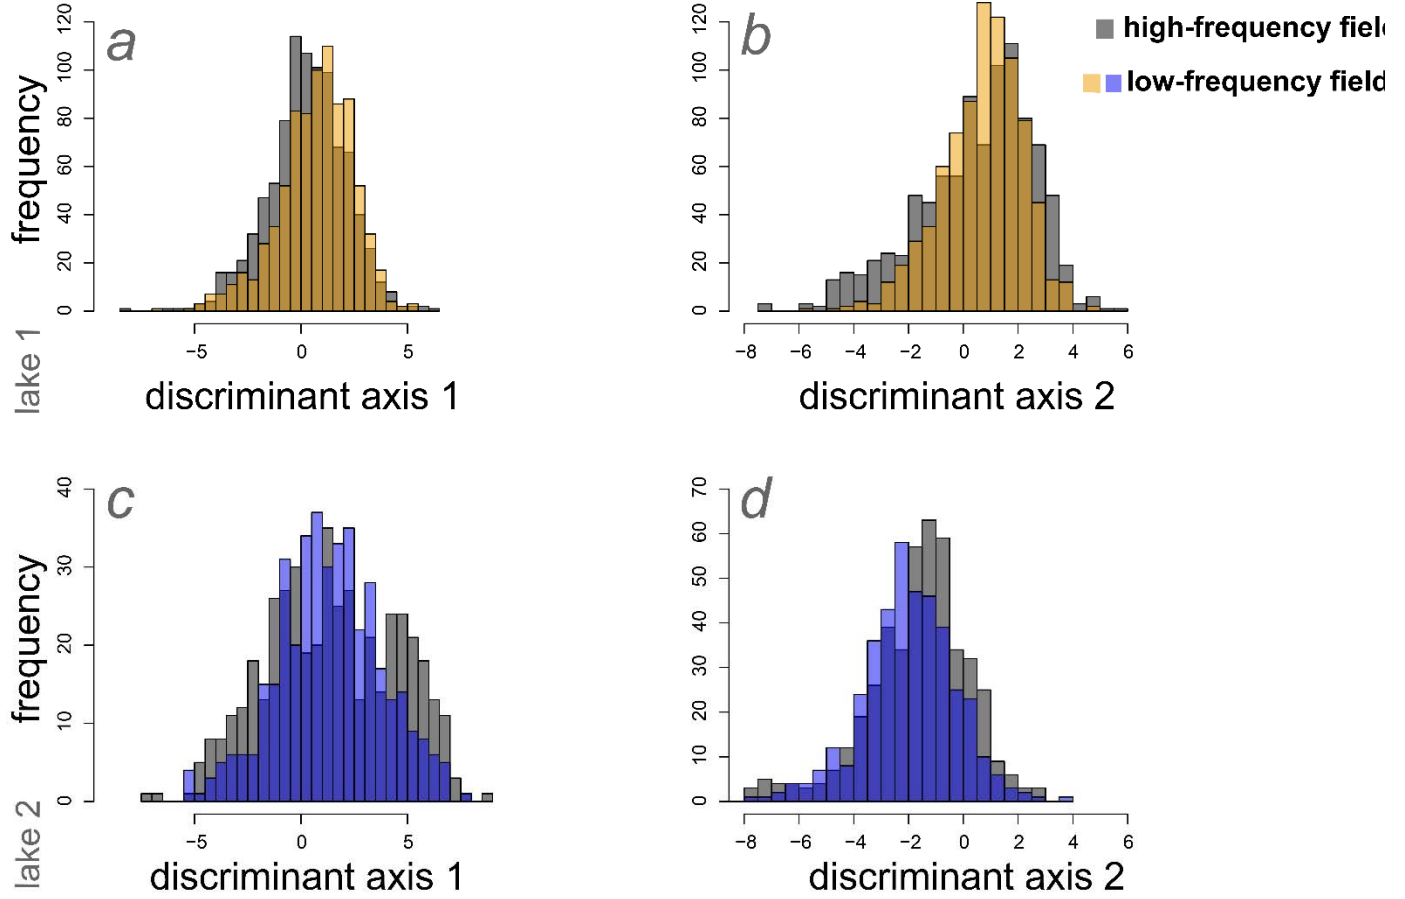

1211

1212 **Fig. S2** Histograms depicting the phenotypic variance of hybrid populations in high- (gray bars)  
1213 and low-frequency (orange/blue) treatments in lake 1 (first row) and lake 2 (second row) on the  
1214 first and second discriminant axes (LD1 and LD2 from Fig. 3).

1215

1216

1217

1218

1219

1220

1221

1222 **Fig. S3**

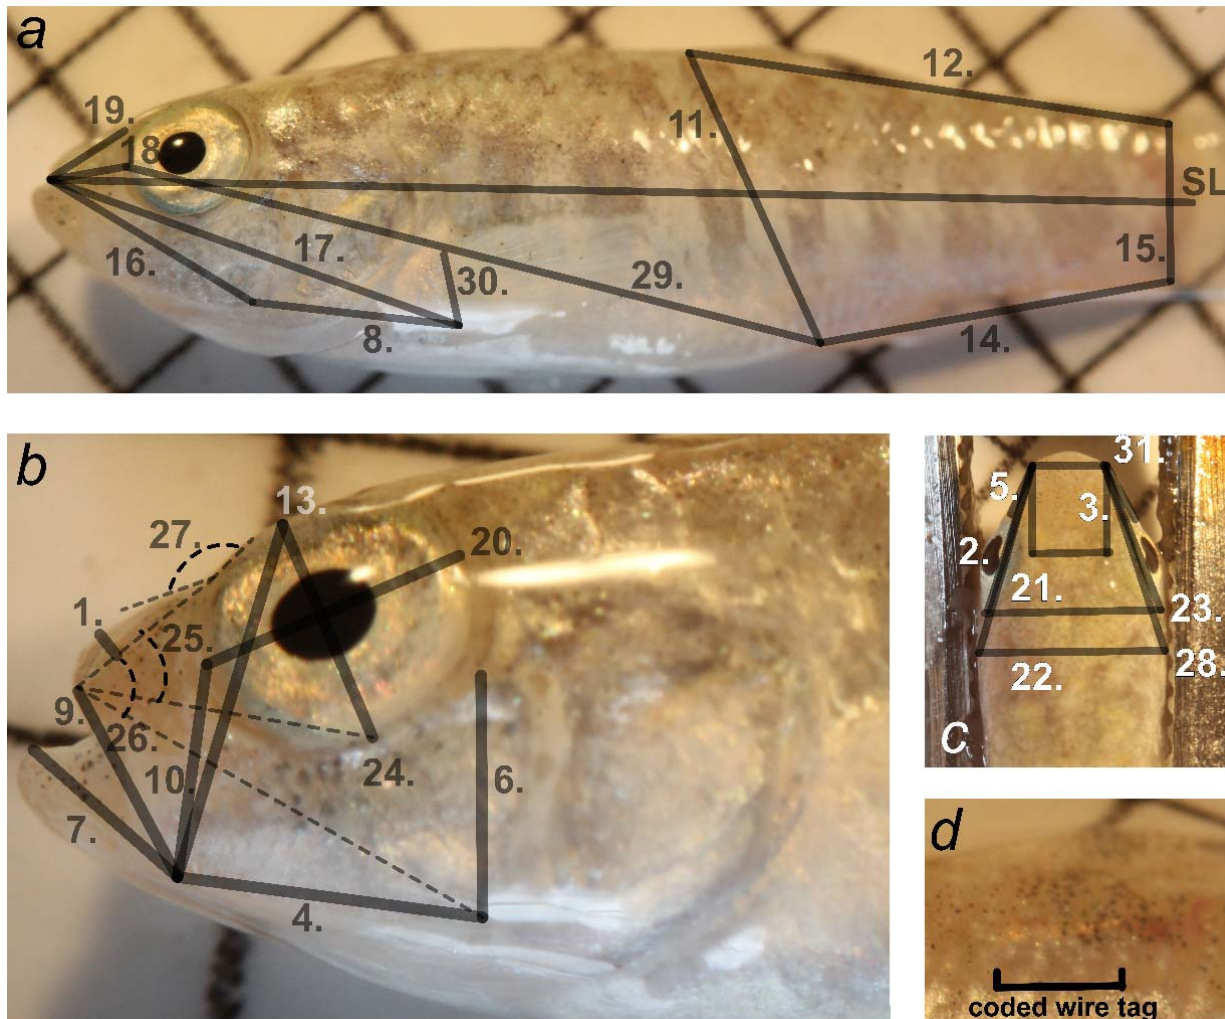

1223  
1224 **Fig. S3 Morphometric landmarks** indicating the 28 linear distances, 3 angles (25-27), and  
1225 standard length (SL) for *a*) lateral, *b*) close-up of the craniofacial region, *c*) dorsal view, and *d*)  
1226 close-up of the injected coded wire tag in the dorsal musculature including injection site (note  
1227 different hybrid image used here for clarity). Numbers correspond to named traits in Tables 2-4.  
1228 Lateral measurements were collected from pre-release photographs of both the left and right  
1229 sides of each hybrid and averaged for all analyses. Dorsal view anteroposterior measurements  
1230 (2,3,5,23,28) were also measured on each side and averaged for analyses. The 2 mm grid boxes  
1231 in each image were used for calibration.

1232 **Fig. S4**

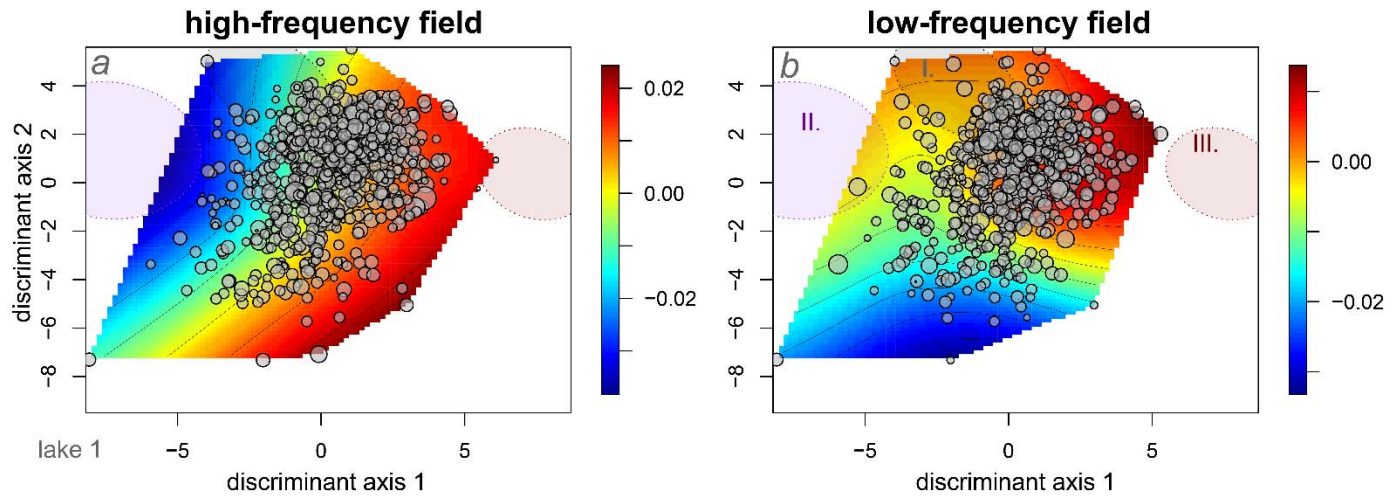

1233

1234 **Fig. S4 Growth rate fitness landscapes for a) high-frequency and b) low-frequency**

1235 **treatments in lake 1 (Crescent Pond).** Thin-plate splines predict the growth rate (heat color)

1236 across a single linear discriminant morphospace separating generalist and scale-eater phenotypes

1237 (x-axis: LD1) and generalist and molluscivore phenotypes (y-axis: LD2). Survivors in field

1238 enclosures are depicted in black relative to deaths over the 3-month exposure period. All hybrids

1239 are plotted within a shared linear discriminant morphospace calculated from lab-reared F1

1240 individuals of parental populations in both lakes. 95% confidence ellipses indicate generalist (I.

1241 grey), molluscivore (II. purple), and scale-eater (III. red) regions of the morphospace.

1242

1243

1244

1245

1246

1247

1248



1249 **Fig. S5**

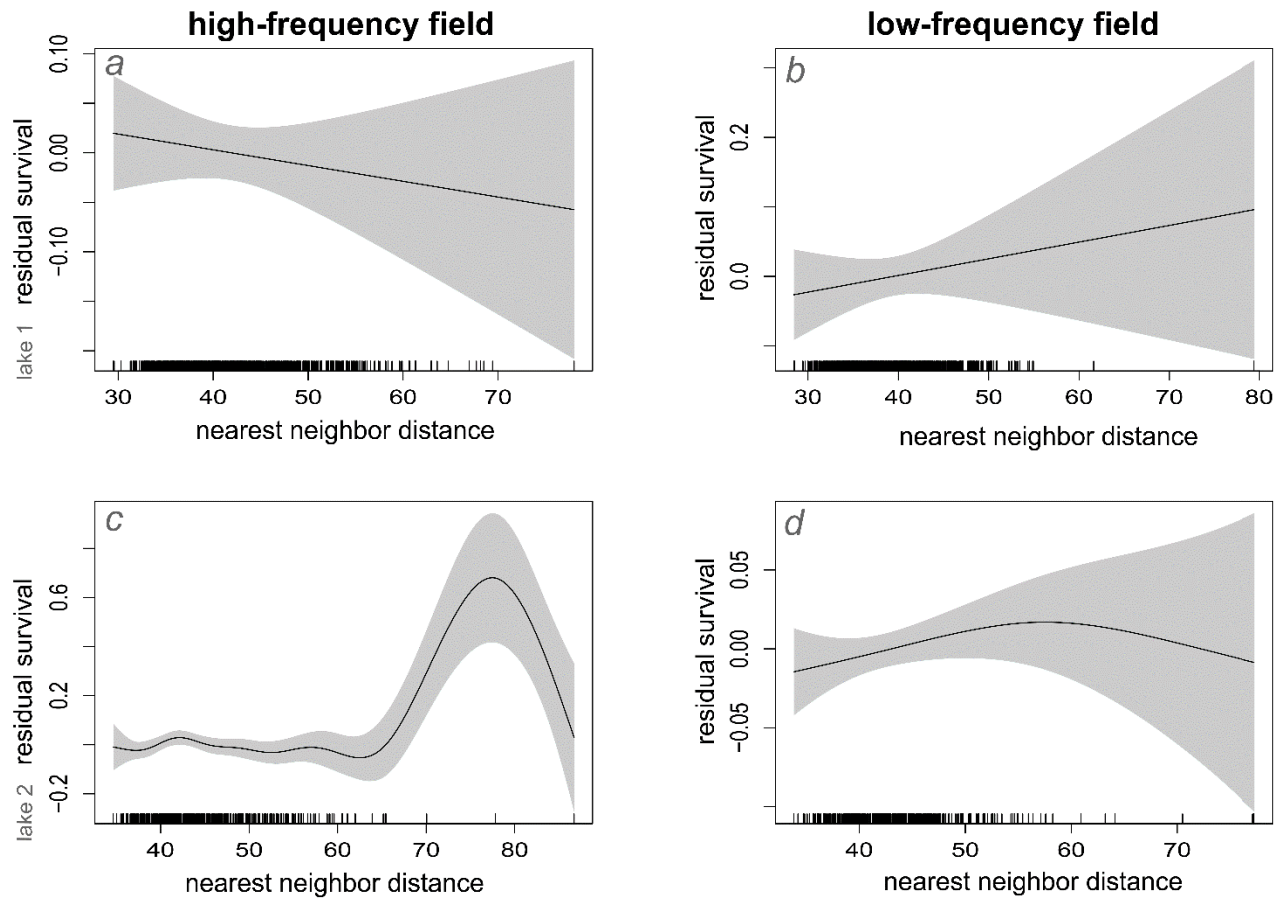

1250

1251 **Fig. S5 Residual survival probability relative to the density of similar hybrid phenotypes in**

1252 **high- (first column) and low-frequency (second column) field enclosures. Residuals**

1253 calculated from the excess survival probability not explained by the thin-plate splines estimated

1254 for hybrid phenotype in the discriminant morphospace (Fig. 3). The frequency of similar hybrid

1255 phenotypes was calculated for each hybrid from the nearest-neighbor Euclidean distances to the

1256 ten most similar hybrid phenotypes in the full morphospace.

1257

1258

1259

1260

1261 **Fig. S6**

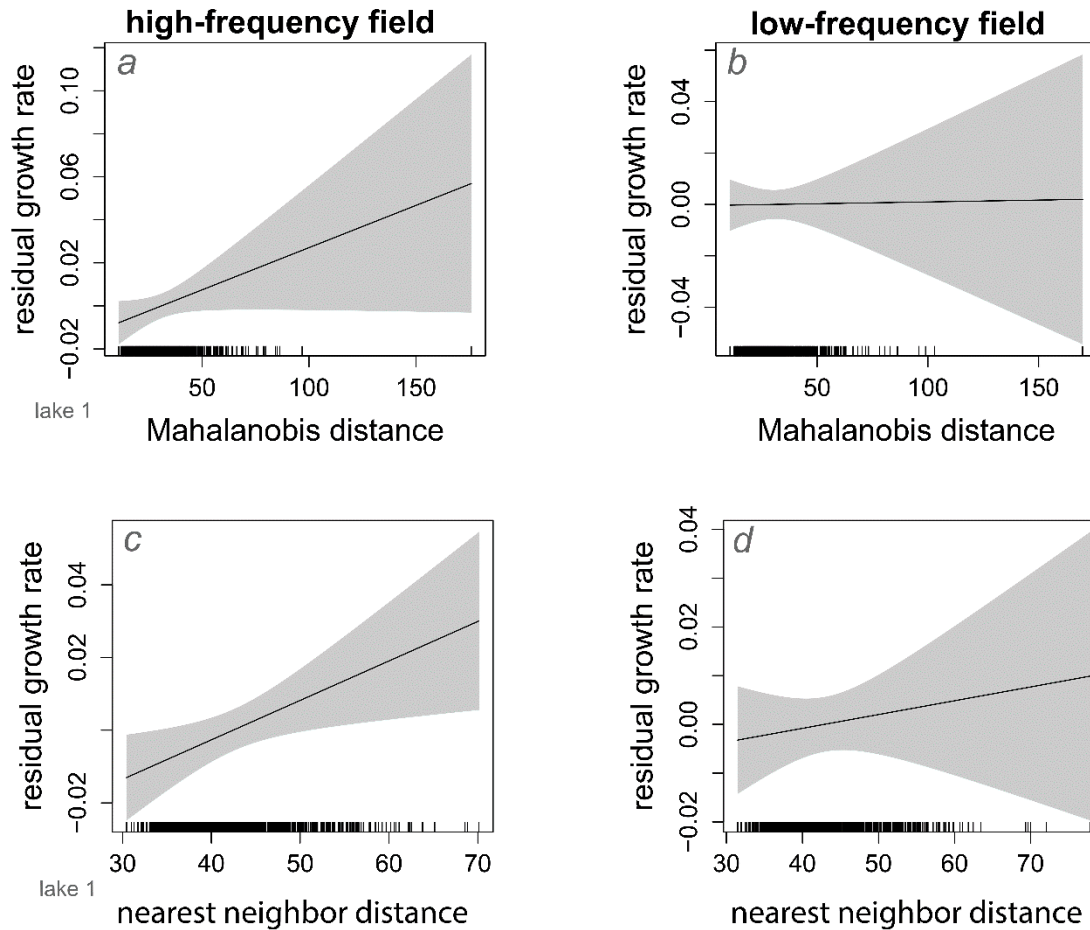

1262

1263 **Fig. S6 Residual growth rate relative to the density of similar hybrid phenotypes in high-**

1264 **(first column) and low-frequency (second column) field enclosures. Residuals calculated**

1265 from the growth rate variance not explained by the thin-plate splines estimated for hybrid

1266 phenotype in the linear discriminant morphospace (Fig. S5). The frequency of similar hybrid

1267 phenotypes was calculated for each hybrid from *a-b*) the Mahalanobis distance to the mean

1268 hybrid phenotype within each treatment and *c-d*) the sum of nearest-neighbor Euclidean

1269 distances to the ten most similar hybrid phenotypes in the full 30-trait morphospace.

1270

1271

1272 **Fig. S7**

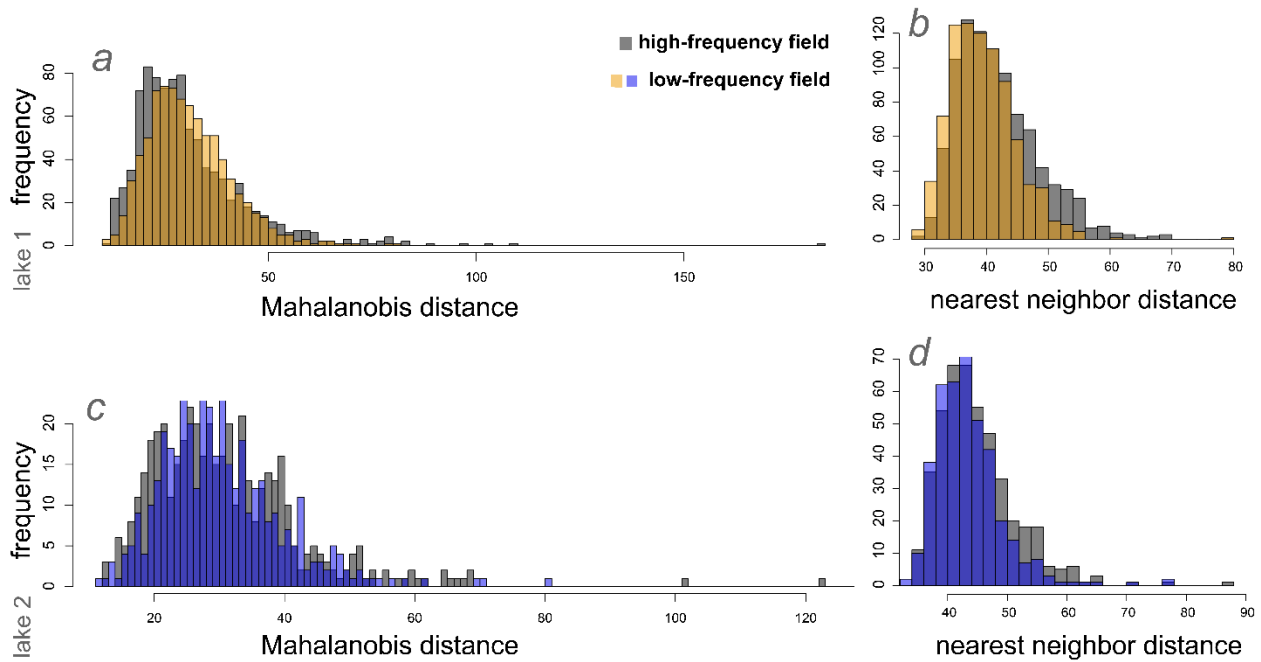

1273

1274 **Fig. S7** Histograms depicting the frequency of competitors in high- (gray bars) and low-  
1275 frequency (orange/blue) treatments in lake 1 (first row) and lake 2 (second row) for both  
1276 Mahalanobis distance (first column) and nearest neighbor distance to the ten nearest phenotypes  
1277 (second column).

1278

1279

1280

1281

1282

1283

1284

1285
